# Supplementary material
Source: PubMed Central journal article supplement (PMC6402350)
Supplement: NIHMS1004392-supplement-Xiao_Chen_Schnoor.pdf [file NIHMS1004392-supplement-Xiao_Chen_Schnoor.pdf]

**Insight into Multiple and Multi-level Structures of Biochars and Their Potential  
Environmental Applications: A Critical Review**

XIN XIAO<sup>1,2</sup>; BAOLIANG CHEN<sup>1,2\*</sup>; ZAIMING CHEN<sup>3</sup>; LIZHONG ZHU<sup>1,2</sup>; JERALD L. SCHNOOR<sup>4</sup>

1. Department of Environmental Science, Zhejiang University, Hangzhou 310058, China;
2. Zhejiang Provincial Key Laboratory of Organic Pollution Process and Control, Hangzhou 310058, China
3. Department of Environmental Engineering, Ningbo University, Ningbo 315211, China;
4. Department of Civil and Environmental Engineering, University of Iowa, Iowa City, Iowa 52242, United States

Corresponding Author Phone & Fax: 86-571-88982587

Email: blchen@zju.edu.cn

**Table S1. Extracted small molecules from biochars.**

| <b>Compounds</b>                      | <b>Content (mg/kg)</b>                     | <b>Biochars</b>                            |
|---------------------------------------|--------------------------------------------|--------------------------------------------|
| Total volatile compounds <sup>1</sup> | ~850                                       | Digestate hydrothermal biochars, 190 °C    |
|                                       | ~2750                                      | Digestate hydrothermal biochars, 230 °C    |
|                                       | ~3390                                      | Digestate hydrothermal biochars, 250 °C    |
|                                       | ~5930                                      | Digestate hydrothermal biochars, 270 °C    |
|                                       | ~1060                                      | Wheat straw hydrothermal biochars, 190 °C  |
|                                       | ~2330                                      | Wheat straw hydrothermal biochars, 230 °C  |
|                                       | ~3390                                      | Wheat straw hydrothermal biochars, 250 °C  |
|                                       | ~5000                                      | Wheat straw hydrothermal biochars, 270 °C  |
|                                       | ~1200                                      | Poplar wood hydrothermal biochars, 190 °C  |
|                                       | ~1290                                      | Poplar wood hydrothermal biochars, 230 °C  |
|                                       | ~1700                                      | Poplar wood hydrothermal biochars, 250 °C  |
|                                       | ~6350                                      | Poplar wood hydrothermal biochars, 270 °C  |
|                                       | ~3600                                      | Pine wood hydrothermal biochars, 190 °C    |
|                                       | ~12910                                     | Pine wood hydrothermal biochars, 230 °C    |
|                                       | ~10370                                     | Pine wood hydrothermal biochars, 250 °C    |
|                                       | ~16290                                     | Pine wood hydrothermal biochars, 270 °C    |
|                                       | ~2750                                      | Massaranduba hydrothermal biochars, 190 °C |
|                                       | ~2960                                      | Massaranduba hydrothermal biochars, 230 °C |
|                                       | ~2320                                      | Massaranduba hydrothermal biochars, 250 °C |
|                                       | ~2110                                      | Massaranduba hydrothermal biochars, 270 °C |
|                                       | ~2320                                      | Garapa hydrothermal biochars, 190 °C       |
|                                       | ~2540                                      | Garapa hydrothermal biochars, 230 °C       |
|                                       | ~2110                                      | Garapa hydrothermal biochars, 250 °C       |
|                                       | ~6340                                      | Garapa hydrothermal biochars, 270 °C       |
|                                       | ~200                                       | Digestate hydrothermal biochars, 190 °C    |
|                                       | ~600                                       | Digestate hydrothermal biochars, 230 °C    |
|                                       | ~783                                       | Digestate hydrothermal biochars, 250 °C    |
|                                       | ~1164                                      | Digestate hydrothermal biochars, 270 °C    |
|                                       | ~105                                       | Wheat straw hydrothermal biochars, 190 °C  |
|                                       | ~381                                       | Wheat straw hydrothermal biochars, 230 °C  |
|                                       | ~400                                       | Wheat straw hydrothermal biochars, 250 °C  |
|                                       | ~990                                       | Wheat straw hydrothermal biochars, 270 °C  |
|                                       | ~148                                       | Poplar wood hydrothermal biochars, 190 °C  |
| ~388                                  | Poplar wood hydrothermal biochars, 230 °C  |                                            |
| ~423                                  | Poplar wood hydrothermal biochars, 250 °C  |                                            |
| ~1883                                 | Poplar wood hydrothermal biochars, 270 °C  |                                            |
| ~42                                   | Pine wood hydrothermal biochars, 190 °C    |                                            |
| ~382                                  | Pine wood hydrothermal biochars, 230 °C    |                                            |
| ~338                                  | Pine wood hydrothermal biochars, 250 °C    |                                            |
| ~1269                                 | Pine wood hydrothermal biochars, 270 °C    |                                            |
| ~42                                   | Massaranduba hydrothermal biochars, 190 °C |                                            |
| ~84                                   | Massaranduba hydrothermal biochars, 230 °C |                                            |
| Total volatile phenols <sup>1</sup>   |                                            |                                            |
|                                       |                                            |                                            |
|                                       |                                            |                                            |
|                                       |                                            |                                            |
|                                       |                                            |                                            |
|                                       |                                            |                                            |
|                                       |                                            |                                            |
|                                       |                                            |                                            |
|                                       |                                            |                                            |
|                                       |                                            |                                            |
|                                       |                                            |                                            |
|                                       |                                            |                                            |
|                                       |                                            |                                            |
|                                       |                                            |                                            |
|                                       |                                            |                                            |

|                                                                    |       |                                            |
|--------------------------------------------------------------------|-------|--------------------------------------------|
|                                                                    | ~275  | Massaranduba hydrothermal biochars, 250 °C |
|                                                                    | ~338  | Massaranduba hydrothermal biochars, 270 °C |
|                                                                    | ~50   | Garapa hydrothermal biochars, 190 °C       |
|                                                                    | ~254  | Garapa hydrothermal biochars, 230 °C       |
|                                                                    | ~317  | Garapa hydrothermal biochars, 250 °C       |
|                                                                    | ~1015 | Garapa hydrothermal biochars, 270 °C       |
|                                                                    | ~0    | Digestate hydrothermal biochars, 190 °C    |
|                                                                    | ~63   | Digestate hydrothermal biochars, 230 °C    |
|                                                                    | ~148  | Digestate hydrothermal biochars, 250 °C    |
|                                                                    | ~390  | Digestate hydrothermal biochars, 270 °C    |
|                                                                    | ~0    | Wheat straw hydrothermal biochars, 190 °C  |
|                                                                    | ~42   | Wheat straw hydrothermal biochars, 230 °C  |
|                                                                    | ~127  | Wheat straw hydrothermal biochars, 250 °C  |
|                                                                    | ~275  | Wheat straw hydrothermal biochars, 270 °C  |
|                                                                    | ~0    | Poplar wood hydrothermal biochars, 190 °C  |
|                                                                    | ~0    | Poplar wood hydrothermal biochars, 230 °C  |
|                                                                    | ~42   | Poplar wood hydrothermal biochars, 250 °C  |
| Summary of benzene, toluene, ethylbenzene, and xylene <sup>1</sup> | ~254  | Poplar wood hydrothermal biochars, 270 °C  |
|                                                                    | ~21   | Pine wood hydrothermal biochars, 190 °C    |
|                                                                    | ~250  | Pine wood hydrothermal biochars, 230 °C    |
|                                                                    | ~338  | Pine wood hydrothermal biochars, 250 °C    |
|                                                                    | ~1227 | Pine wood hydrothermal biochars, 270 °C    |
|                                                                    | ~0    | Massaranduba hydrothermal biochars, 190 °C |
|                                                                    | ~0    | Massaranduba hydrothermal biochars, 230 °C |
|                                                                    | ~63   | Massaranduba hydrothermal biochars, 250 °C |
|                                                                    | ~84   | Massaranduba hydrothermal biochars, 270 °C |
|                                                                    | ~0    | Garapa hydrothermal biochars, 190 °C       |
|                                                                    | ~40   | Garapa hydrothermal biochars, 230 °C       |
|                                                                    | ~80   | Garapa hydrothermal biochars, 250 °C       |
|                                                                    | ~250  | Garapa hydrothermal biochars, 270 °C       |
|                                                                    | ~100  | Digestate hydrothermal biochars, 190 °C    |
|                                                                    | ~200  | Digestate hydrothermal biochars, 230 °C    |
|                                                                    | ~410  | Digestate hydrothermal biochars, 250 °C    |
|                                                                    | ~740  | Digestate hydrothermal biochars, 270 °C    |
|                                                                    | ~105  | Wheat straw hydrothermal biochars, 190 °C  |
|                                                                    | ~310  | Wheat straw hydrothermal biochars, 230 °C  |
|                                                                    | ~845  | Wheat straw hydrothermal biochars, 250 °C  |
| <b>Total volatile benzenes<sup>1</sup></b>                         | ~850  | Wheat straw hydrothermal biochars, 270 °C  |
|                                                                    | ~0    | Poplar wood hydrothermal biochars, 190 °C  |
|                                                                    | ~0    | Poplar wood hydrothermal biochars, 230 °C  |
|                                                                    | ~105  | Poplar wood hydrothermal biochars, 250 °C  |
|                                                                    | ~510  | Poplar wood hydrothermal biochars, 270 °C  |
|                                                                    | ~1370 | Pine wood hydrothermal biochars, 190 °C    |
|                                                                    | ~9205 | Pine wood hydrothermal biochars, 230 °C    |
|                                                                    | ~7300 | Pine wood hydrothermal biochars, 250 °C    |

|                                 |            |                                                      |
|---------------------------------|------------|------------------------------------------------------|
|                                 | ~9000      | Pine wood hydrothermal biochars, 270 °C              |
|                                 | ~0         | Massaranduba hydrothermal biochars, 190 °C           |
|                                 | ~0         | Massaranduba hydrothermal biochars, 230 °C           |
|                                 | ~420       | Massaranduba hydrothermal biochars, 250 °C           |
|                                 | ~210       | Massaranduba hydrothermal biochars, 270 °C           |
|                                 | ~0         | Garapa hydrothermal biochars, 190 °C                 |
|                                 | ~200       | Garapa hydrothermal biochars, 230 °C                 |
|                                 | ~200       | Garapa hydrothermal biochars, 250 °C                 |
|                                 | ~1480      | Garapa hydrothermal biochars, 270 °C                 |
| <b>naphthalene</b>              | n.d.*      |                                                      |
| <b>acenaphtylene</b>            | n.d.       |                                                      |
| <b>acenaphthene</b>             | n.d.       |                                                      |
| <b>fluoranten</b>               | 3.56±0.26  |                                                      |
| <b>phenanthren</b>              | 7.75±1.05  |                                                      |
| <b>anthracene</b>               | 2.32±0.17  |                                                      |
| <b>fluoranthene</b>             | n.d.       |                                                      |
| <b>pyrene</b>                   | 17.07±2.55 | Miscanthus derived biochar, 350~650 °C <sup>2</sup>  |
| <b>benzo[a]anthracene</b>       | 2.08±0.16  |                                                      |
| <b>chrysene</b>                 | 6.12±0.67  |                                                      |
| <b>benzo[b]fluoranthene</b>     | n.d.       |                                                      |
| <b>benzo[k]fluoranthene</b>     | n.d.       |                                                      |
| <b>benzo[a]pyrene</b>           | 1.00±0.05  |                                                      |
| <b>dibenz[ah]anthracene</b>     | n.d.       |                                                      |
| <b>benzo[ghi]perylene</b>       | n.d.       |                                                      |
| <b>indeno [1,2,3-cd] pyrene</b> | n.d.       |                                                      |
| <b>naphthalene</b>              | n.d.       |                                                      |
| <b>acenaphtylene</b>            | n.d.       |                                                      |
| <b>acenaphthene</b>             | n.d.       |                                                      |
| <b>fluoranten</b>               | n.d.       |                                                      |
| <b>phenanthren</b>              | 0.88±0.11  |                                                      |
| <b>anthracene</b>               | 0.11±0.02  |                                                      |
| <b>fluoranthene</b>             | 0.44±0.05  |                                                      |
| <b>pyrene</b>                   | 1.26±0.12  | Willow derived biochar, 350~650 °C <sup>2</sup>      |
| <b>benzo[a]anthracene</b>       | 0.09±0.01  |                                                      |
| <b>chrysene</b>                 | 0.70±0.07  |                                                      |
| <b>benzo[b]fluoranthene</b>     | n.d.       |                                                      |
| <b>benzo[k]fluoranthene</b>     | n.d.       |                                                      |
| <b>benzo[a]pyrene</b>           | 0.05±0.01  |                                                      |
| <b>dibenz[ah]anthracene</b>     | n.d.       |                                                      |
| <b>benzo[ghi]perylene</b>       | n.d.       |                                                      |
| <b>indeno [1,2,3-cd] pyrene</b> | n.d.       |                                                      |
| <b>naphthalene</b>              | n.d.       |                                                      |
| <b>acenaphtylene</b>            | 4.89±0.47  | Wheat straw derived biochar, 350~650 °C <sup>2</sup> |
| <b>acenaphthene</b>             | 7.23±1.06  |                                                      |
| <b>fluoranten</b>               | 0.81±0.08  |                                                      |

|                                         |              |                                     |
|-----------------------------------------|--------------|-------------------------------------|
| <b>phenanthren</b>                      | 1.29±0.09    |                                     |
| <b>anthracene</b>                       | 0.18±0.01    |                                     |
| <b>fluoranthene</b>                     | 2.06±0.15    |                                     |
| <b>pyrene</b>                           | 3.04±0.38    |                                     |
| <b>benzo[a]anthracene</b>               | 0.10±0.02    |                                     |
| <b>chrysene</b>                         | 0.10±0.01    |                                     |
| <b>benzo[b]fluoranthene</b>             | 0.05±0.01    |                                     |
| <b>benzo[k]fluoranthene</b>             | n.d.         |                                     |
| <b>benzo[a]pyrene</b>                   | 0.04±0.01    |                                     |
| <b>dibenz[ah]anthracene</b>             | n.d.         |                                     |
| <b>benzo[ghi]perylene</b>               | 0.07±0.01    |                                     |
| <b>indeno [1,2,3-cd] pyrene</b>         | n.d.         |                                     |
|                                         | ~0.21        | Bamboo, 600 °C                      |
|                                         | ~0.49        | Maize, 600 °C                       |
|                                         | ~0.28        | Redwood, 300 °C                     |
| <b>Naphthalene<sup>3</sup></b>          | ~1.62        | Bamboo, 300 °C                      |
|                                         | ~2.70        | Rice straw, 300 °C                  |
|                                         | ~4.66        | Maize, 300 °C                       |
|                                         | ~5.07        | Gasified softwood, 1000 °C          |
| <b>Acenaphthene<sup>3</sup></b>         | ~1.68        | Gasified softwood, 1000 °C          |
| <b>Acenaphthylene<sup>3</sup></b>       | ~1.20        | Gasified softwood, 1000 °C          |
|                                         | ~0.07        | Redwood, 300 °C                     |
| <b>Fluorene<sup>3</sup></b>             | ~0.07        | Bamboo, 300 °C                      |
|                                         | ~0.28        | Gasified softwood, 1000 °C          |
|                                         | ~0.05        | Rice straw, 600 °C                  |
| <b>Anthracene<sup>3</sup></b>           | ~0.12        | Redwood, 300 °C                     |
|                                         | ~0.21        | Rice straw, 300 °C                  |
|                                         | ~0.20        | Gasified softwood, 1000 °C          |
|                                         | ~0.05        | Redwood, 600 °C                     |
|                                         | ~0.14        | Rice straw, 600 °C                  |
| <b>Fluoranthene<sup>3</sup></b>         | ~0.12        | Maize, 600 °C                       |
|                                         | ~0.2         | Redwood, 300 °C                     |
|                                         | ~0.49        | Rice straw, 300 °C                  |
|                                         | ~0.05        | Maize, 300 °C                       |
|                                         | ~0.08        | Gasified softwood, 1000 °C          |
|                                         | ~0.84        | Bamboo, 600 °C                      |
|                                         | ~0.91        | Rice straw, 600 °C                  |
| <b>Pyrene<sup>3</sup></b>               | ~0.84        | Maize, 600 °C                       |
|                                         | ~0.88        | Redwood, 300 °C                     |
|                                         | ~0.80        | Bamboo, 300 °C                      |
|                                         | ~1.12        | Rice straw, 300 °C                  |
|                                         | ~0.82        | Maize, 300 °C                       |
| <b>Benzo[a]anthracene<sup>3</sup></b>   | ~0.21        | Redwood, 300 °C                     |
| <b>Benzo[b]fluoranthene<sup>3</sup></b> | ~0.20        | Redwood, 300 °C                     |
| <b>Naphthalene</b>                      | 12.64 ± 1.07 | Heartland pine, 850 °C <sup>4</sup> |

|                             |                |                                          |
|-----------------------------|----------------|------------------------------------------|
| <b>Acenaphthylene</b>       | 2.67 ± 0.93    |                                          |
| <b>Acenaphthene</b>         | 1.51 ± 0.19    |                                          |
| <b>Fluorene</b>             | 1.24 ± 0.10    |                                          |
| <b>Phenanthrene</b>         | 9.63 ± 1.06    |                                          |
| <b>Antracene</b>            | 3.39 ± 0.79    |                                          |
| <b>Fluorantene</b>          | 4.99 ± 0.46    |                                          |
| <b>Pyrene</b>               | 3.20 ± 0.28    |                                          |
| <b>Benz(a)antracene</b>     | 1.77 ± 0.16    |                                          |
| <b>Chrysene</b>             | 1.69 ± 0.20    |                                          |
| <b>Benzo[b]fluoranthene</b> | 0.57 ± 0.23    |                                          |
| <b>Benzo(k)fluorantene</b>  | 0.80 ± 0.15    |                                          |
| <b>Benzo(a)pyrene</b>       | 0.75 ± 0.21    |                                          |
| <b>Indeno(123cd)pyrene</b>  | 0.15 ± 0.05    |                                          |
| <b>Dibenz(ah)antracene</b>  | 0.05 ± 0.02    |                                          |
| <b>Benzo(ghi)perylene</b>   | 0.09 ± 0.03    |                                          |
| <b>Total PAHs</b>           | 45.13 ± 3.42   |                                          |
| <b>Naphthalene</b>          | 0.097 ± 0.0137 |                                          |
| <b>Acenaphthylene</b>       | 0.000 ± 0.0000 |                                          |
| <b>Acenaphthene</b>         | 0.000 ± 0.0000 |                                          |
| <b>Fluorene</b>             | 0.013 ± 0.0028 |                                          |
| <b>Phenanthrene</b>         | 0.078 ± 0.0058 |                                          |
| <b>Antracene</b>            | 0.014 ± 0.0012 |                                          |
| <b>Fluorantene</b>          | 0.033 ± 0.0028 |                                          |
| <b>Pyrene</b>               | 0.043 ± 0.0019 |                                          |
| <b>Benz(a)antracene</b>     | 0.014 ± 0.0017 | Hardwood, 450-500 °C <sup>4</sup>        |
| <b>Chrysene</b>             | 0.018 ± 0.0012 |                                          |
| <b>Benzo[b]fluoranthene</b> | 0.007 ± 0.0064 |                                          |
| <b>Benzo(k)fluorantene</b>  | 0.004 ± 0.0032 |                                          |
| <b>Benzo(a)pyrene</b>       | 0.008 ± 0.0017 |                                          |
| <b>Indeno(123cd)pyrene</b>  | 0.004 ± 0.0007 |                                          |
| <b>Dibenz(ah)antracene</b>  | 0.000 ± 0.0000 |                                          |
| <b>Benzo(ghi)perylene</b>   | 0.005 ± 0.0005 |                                          |
| <b>Total PAHs</b>           | 0.338 ± 0.0267 |                                          |
| <b>Naphthalene</b>          | 0.321 ± 0.0131 |                                          |
| <b>Acenaphthylene</b>       | 0.003 ± 0.0030 |                                          |
| <b>Acenaphthene</b>         | 0.000 ± 0.0000 | Lodge pole pine, 700-750 °C <sup>4</sup> |
| <b>Fluorene</b>             | 0.010 ± 0.0009 |                                          |
| <b>Phenanthrene</b>         | 0.270 ± 0.0268 |                                          |
| <b>Antracene</b>            | 0.073 ± 0.0063 |                                          |

|                             |                |                                            |
|-----------------------------|----------------|--------------------------------------------|
| <b>Fluorantene</b>          | 0.065 ± 0.0037 |                                            |
| <b>Pyrene</b>               | 0.077 ± 0.0042 |                                            |
| <b>Benz(a)anthracene</b>    | 0.046 ± 0.0049 |                                            |
| <b>Chrysene</b>             | 0.044 ± 0.0027 |                                            |
| <b>Benzo[b]fluoranthene</b> | 0.019 ± 0.0029 |                                            |
| <b>Benzo(k)fluorantene</b>  | 0.015 ± 0.0021 |                                            |
| <b>Benzo(a)pyrene</b>       | 0.036 ± 0.0039 |                                            |
| <b>Indeno(123cd)pyrene</b>  | 0.012 ± 0.0037 |                                            |
| <b>Dibenz(ah)anthracene</b> | 0.003 ± 0.0006 |                                            |
| <b>Benzo(ghi)perylene</b>   | 0.012 ± 0.0032 |                                            |
| <b>Total PAHs</b>           | 1.008 ± 0.0543 |                                            |
| <b>Naphthalene</b>          | 0.042 ± 0.0002 |                                            |
| <b>Acenaphthylene</b>       | 0.000 ± 0.0000 |                                            |
| <b>Acenaphthene</b>         | 0.008 ± 0.0068 |                                            |
| <b>Fluorene</b>             | 0.059 ± 0.0036 |                                            |
| <b>Phenanthrene</b>         | 0.069 ± 0.0053 |                                            |
| <b>Antracene</b>            | 0.024 ± 0.0017 |                                            |
| <b>Fluorantene</b>          | 0.025 ± 0.0015 |                                            |
| <b>Pyrene</b>               | 0.042 ± 0.0008 |                                            |
| <b>Benz(a)anthracene</b>    | 0.013 ± 0.0004 | Digested dairy manure, 300 °C <sup>4</sup> |
| <b>Chrysene</b>             | 0.017 ± 0.0009 |                                            |
| <b>Benzo[b]fluoranthene</b> | 0.001 ± 0.0025 |                                            |
| <b>Benzo(k)fluorantene</b>  | 0.004 ± 0.0069 |                                            |
| <b>Benzo(a)pyrene</b>       | 0.017 ± 0.0015 |                                            |
| <b>Indeno(123cd)pyrene</b>  | 0.005 ± 0.0046 |                                            |
| <b>Dibenz(ah)anthracene</b> | 0.000 ± 0.0000 |                                            |
| <b>Benzo(ghi)perylene</b>   | 0.005 ± 0.0048 |                                            |
| <b>Total PAHs</b>           | 0.332 ± 0.0191 |                                            |
| <b>Naphthalene</b>          | 0.053 ± 0.0136 |                                            |
| <b>Acenaphthylene</b>       | 0.000 ± 0.0000 |                                            |
| <b>Acenaphthene</b>         | 0.000 ± 0.0000 |                                            |
| <b>Fluorene</b>             | 0.030 ± 0.0085 |                                            |
| <b>Phenanthrene</b>         | 0.050 ± 0.0121 |                                            |
| <b>Antracene</b>            | 0.012 ± 0.0026 | Digested dairy manure, 400 °C <sup>4</sup> |
| <b>Fluorantene</b>          | 0.019 ± 0.0034 |                                            |
| <b>Pyrene</b>               | 0.030 ± 0.0056 |                                            |
| <b>Benz(a)anthracene</b>    | 0.010 ± 0.0030 |                                            |
| <b>Chrysene</b>             | 0.015 ± 0.0043 |                                            |
| <b>Benzo[b]fluoranthene</b> | 0.000 ± 0.0000 |                                            |

|                             |                |                                            |
|-----------------------------|----------------|--------------------------------------------|
| <b>Benzo(k)fluorantene</b>  | 0.000 ± 0.0000 |                                            |
| <b>Benzo(a)pyrene</b>       | 0.007 ± 0.0063 |                                            |
| <b>Indeno(123cd)pyrene</b>  | 0.006 ± 0.0055 |                                            |
| <b>Dibenz(ah)anthracene</b> | 0.000 ± 0.0000 |                                            |
| <b>Benzo(ghi)perylene</b>   | 0.003 ± 0.0033 |                                            |
| <b>Total PAHs</b>           | 0.234 ± 0.0651 |                                            |
| <b>Naphthalene</b>          | 0.086 ± 0.0041 |                                            |
| <b>Acenaphthylene</b>       | 0.000 ± 0.0000 |                                            |
| <b>Acenaphthene</b>         | 0.000 ± 0.0000 |                                            |
| <b>Fluorene</b>             | 0.057 ± 0.0145 |                                            |
| <b>Phenanthrene</b>         | 0.064 ± 0.0127 |                                            |
| <b>Antracene</b>            | 0.019 ± 0.0067 |                                            |
| <b>Fluorantene</b>          | 0.024 ± 0.0063 |                                            |
| <b>Pyrene</b>               | 0.040 ± 0.0090 |                                            |
| <b>Benz(a)anthracene</b>    | 0.011 ± 0.0029 | Digested dairy manure, 500 °C <sup>4</sup> |
| <b>Chrysene</b>             | 0.022 ± 0.0060 |                                            |
| <b>Benzo[b]fluoranthene</b> | 0.002 ± 0.0037 |                                            |
| <b>Benzo(k)fluorantene</b>  | 0.003 ± 0.0046 |                                            |
| <b>Benzo(a)pyrene</b>       | 0.011 ± 0.0096 |                                            |
| <b>Indeno(123cd)pyrene</b>  | 0.000 ± 0.0000 |                                            |
| <b>Dibenz(ah)anthracene</b> | 0.000 ± 0.0000 |                                            |
| <b>Benzo(ghi)perylene</b>   | 0.003 ± 0.0054 |                                            |
| <b>Total PAHs</b>           | 0.343 ± 0.0791 |                                            |
| <b>Naphthalene</b>          | 0.074 ± 0.0117 |                                            |
| <b>Acenaphthylene</b>       | 0.000 ± 0.0000 |                                            |
| <b>Acenaphthene</b>         | 0.000 ± 0.0000 |                                            |
| <b>Fluorene</b>             | 0.005 ± 0.0048 |                                            |
| <b>Phenanthrene</b>         | 0.043 ± 0.0065 |                                            |
| <b>Antracene</b>            | 0.007 ± 0.0010 |                                            |
| <b>Fluorantene</b>          | 0.016 ± 0.0028 |                                            |
| <b>Pyrene</b>               | 0.023 ± 0.0031 | Digested dairy manure, 600 °C <sup>4</sup> |
| <b>Benz(a)anthracene</b>    | 0.006 ± 0.0009 |                                            |
| <b>Chrysene</b>             | 0.010 ± 0.0007 |                                            |
| <b>Benzo[b]fluoranthene</b> | 0.000 ± 0.0000 |                                            |
| <b>Benzo(k)fluorantene</b>  | 0.000 ± 0.0000 |                                            |
| <b>Benzo(a)pyrene</b>       | 0.000 ± 0.0000 |                                            |
| <b>Indeno(123cd)pyrene</b>  | 0.003 ± 0.0026 |                                            |
| <b>Dibenz(ah)anthracene</b> | 0.000 ± 0.0000 |                                            |
| <b>Benzo(ghi)perylene</b>   | 0.001 ± 0.0025 |                                            |



|                             |                |                                 |
|-----------------------------|----------------|---------------------------------|
| <b>Total PAHs</b>           | 0.189 ± 0.0264 |                                 |
| <b>Naphthalene</b>          | 0.044 ± 0.0056 |                                 |
| <b>Acenaphthylene</b>       | 0.000 ± 0.0000 |                                 |
| <b>Acenaphthene</b>         | 0.016 ± 0.0009 |                                 |
| <b>Fluorene</b>             | 0.046 ± 0.0011 |                                 |
| <b>Phenanthrene</b>         | 0.067 ± 0.0033 |                                 |
| <b>Antracene</b>            | 0.009 ± 0.0077 |                                 |
| <b>Fluorantene</b>          | 0.023 ± 0.0015 |                                 |
| <b>Pyrene</b>               | 0.039 ± 0.0028 |                                 |
| <b>Benz(a)anthracene</b>    | 0.011 ± 0.0016 | Food waste, 300 °C <sup>4</sup> |
| <b>Chrysene</b>             | 0.025 ± 0.0013 |                                 |
| <b>Benzo[b]fluoranthene</b> | 0.010 ± 0.0012 |                                 |
| <b>Benzo(k)fluorantene</b>  | 0.008 ± 0.0028 |                                 |
| <b>Benzo(a)pyrene</b>       | 0.031 ± 0.0020 |                                 |
| <b>Indeno(123cd)pyrene</b>  | 0.006 ± 0.0106 |                                 |
| <b>Dibenz(ah)anthracene</b> | 0.000 ± 0.0000 |                                 |
| <b>Benzo(ghi)perylene</b>   | 0.038 ± 0.0069 |                                 |
| <b>Total PAHs</b>           | 0.373 ± 0.0163 |                                 |
| <b>Naphthalene</b>          | 0.062 ± 0.0075 |                                 |
| <b>Acenaphthylene</b>       | 0.000 ± 0.0000 |                                 |
| <b>Acenaphthene</b>         | 0.013 ± 0.0029 |                                 |
| <b>Fluorene</b>             | 0.035 ± 0.0016 |                                 |
| <b>Phenanthrene</b>         | 0.085 ± 0.0059 |                                 |
| <b>Antracene</b>            | 0.016 ± 0.0029 |                                 |
| <b>Fluorantene</b>          | 0.026 ± 0.0057 |                                 |
| <b>Pyrene</b>               | 0.046 ± 0.0062 |                                 |
| <b>Benz(a)anthracene</b>    | 0.019 ± 0.0020 | Food waste, 400 °C <sup>4</sup> |
| <b>Chrysene</b>             | 0.037 ± 0.0033 |                                 |
| <b>Benzo[b]fluoranthene</b> | 0.013 ± 0.0037 |                                 |
| <b>Benzo(k)fluorantene</b>  | 0.016 ± 0.0019 |                                 |
| <b>Benzo(a)pyrene</b>       | 0.023 ± 0.0038 |                                 |
| <b>Indeno(123cd)pyrene</b>  | 0.018 ± 0.0040 |                                 |
| <b>Dibenz(ah)anthracene</b> | 0.000 ± 0.0000 |                                 |
| <b>Benzo(ghi)perylene</b>   | 0.028 ± 0.0021 |                                 |
| <b>Total PAHs</b>           | 0.439 ± 0.0346 |                                 |
| <b>Naphthalene</b>          | 0.090 ± 0.0185 |                                 |
| <b>Acenaphthylene</b>       | 0.000 ± 0.0000 | Food waste, 500 °C <sup>4</sup> |
| <b>Acenaphthene</b>         | 0.018 ± 0.0090 |                                 |
| <b>Fluorene</b>             | 0.063 ± 0.0227 |                                 |

|                             |                |                                       |
|-----------------------------|----------------|---------------------------------------|
| <b>Phenanthrene</b>         | 0.123 ± 0.0457 |                                       |
| <b>Antracene</b>            | 0.034 ± 0.0106 |                                       |
| <b>Fluorantene</b>          | 0.046 ± 0.0185 |                                       |
| <b>Pyrene</b>               | 0.069 ± 0.0241 |                                       |
| <b>Benz(a)antracene</b>     | 0.029 ± 0.0098 |                                       |
| <b>Chrysene</b>             | 0.028 ± 0.0091 |                                       |
| <b>Benzo[b]fluoranthene</b> | 0.017 ± 0.0092 |                                       |
| <b>Benzo(k)fluorantene</b>  | 0.015 ± 0.0077 |                                       |
| <b>Benzo(a)pyrene</b>       | 0.036 ± 0.0085 |                                       |
| <b>Indeno(123cd)pyrene</b>  | 0.028 ± 0.0094 |                                       |
| <b>Dibenz(ah)antracene</b>  | 0.000 ± 0.0000 |                                       |
| <b>Benzo(ghi)perylene</b>   | 0.043 ± 0.0147 |                                       |
| <b>Total PAHs</b>           | 0.638 ± 0.2076 |                                       |
| <b>Naphthalene</b>          | 0.040 ± 0.0008 |                                       |
| <b>Acenaphthylene</b>       | 0.000 ± 0.0000 |                                       |
| <b>Acenaphthene</b>         | 0.000 ± 0.0000 |                                       |
| <b>Fluorene</b>             | 0.000 ± 0.0000 |                                       |
| <b>Phenanthrene</b>         | 0.025 ± 0.0011 |                                       |
| <b>Antracene</b>            | 0.004 ± 0.0003 |                                       |
| <b>Fluorantene</b>          | 0.008 ± 0.0007 |                                       |
| <b>Pyrene</b>               | 0.013 ± 0.0019 |                                       |
| <b>Benz(a)antracene</b>     | 0.003 ± 0.0003 | Food waste, 600 °C <sup>4</sup>       |
| <b>Chrysene</b>             | 0.005 ± 0.0013 |                                       |
| <b>Benzo[b]fluoranthene</b> | 0.000 ± 0.0000 |                                       |
| <b>Benzo(k)fluorantene</b>  | 0.000 ± 0.0000 |                                       |
| <b>Benzo(a)pyrene</b>       | 0.000 ± 0.0000 |                                       |
| <b>Indeno(123cd)pyrene</b>  | 0.000 ± 0.0000 |                                       |
| <b>Dibenz(ah)antracene</b>  | 0.000 ± 0.0000 |                                       |
| <b>Benzo(ghi)perylene</b>   | 0.000 ± 0.0000 |                                       |
| <b>Total PAHs</b>           | 0.098 ± 0.0038 |                                       |
| <b>Naphthalene</b>          | 0.043 ± 0.0192 |                                       |
| <b>Acenaphthylene</b>       | 0.000 ± 0.0000 |                                       |
| <b>Acenaphthene</b>         | 0.000 ± 0.0000 |                                       |
| <b>Fluorene</b>             | 0.014 ± 0.0023 |                                       |
| <b>Phenanthrene</b>         | 0.039 ± 0.0083 | Paper mill waste, 300 °C <sup>4</sup> |
| <b>Antracene</b>            | 0.005 ± 0.0025 |                                       |
| <b>Fluorantene</b>          | 0.010 ± 0.0027 |                                       |
| <b>Pyrene</b>               | 0.009 ± 0.0019 |                                       |
| <b>Benz(a)antracene</b>     | 0.006 ± 0.0017 |                                       |

|                             |                |                                       |
|-----------------------------|----------------|---------------------------------------|
| <b>Chrysene</b>             | 0.009 ± 0.0019 |                                       |
| <b>Benzo[b]fluoranthene</b> | 0.007 ± 0.0008 |                                       |
| <b>Benzo(k)fluorantene</b>  | 0.005 ± 0.0019 |                                       |
| <b>Benzo(a)pyrene</b>       | 0.011 ± 0.0036 |                                       |
| <b>Indeno(123cd)pyrene</b>  | 0.012 ± 0.0006 |                                       |
| <b>Dibenz(ah)anthracene</b> | 0.000 ± 0.0000 |                                       |
| <b>Benzo(ghi)perylene</b>   | 0.011 ± 0.0014 |                                       |
| <b>Total PAHs</b>           | 0.182 ± 0.0398 |                                       |
| <b>Naphthalene</b>          | 0.046 ± 0.0029 |                                       |
| <b>Acenaphthylene</b>       | 0.000 ± 0.0000 |                                       |
| <b>Acenaphthene</b>         | 0.000 ± 0.0000 |                                       |
| <b>Fluorene</b>             | 0.030 ± 0.0034 |                                       |
| <b>Phenanthrene</b>         | 0.071 ± 0.0045 |                                       |
| <b>Antracene</b>            | 0.012 ± 0.0027 |                                       |
| <b>Fluorantene</b>          | 0.018 ± 0.0002 |                                       |
| <b>Pyrene</b>               | 0.038 ± 0.0035 |                                       |
| <b>Benz(a)anthracene</b>    | 0.028 ± 0.0044 | Paper mill waste, 400 °C <sup>4</sup> |
| <b>Chrysene</b>             | 0.021 ± 0.0016 |                                       |
| <b>Benzo[b]fluoranthene</b> | 0.018 ± 0.0050 |                                       |
| <b>Benzo(k)fluorantene</b>  | 0.018 ± 0.0006 |                                       |
| <b>Benzo(a)pyrene</b>       | 0.048 ± 0.0028 |                                       |
| <b>Indeno(123cd)pyrene</b>  | 0.045 ± 0.0025 |                                       |
| <b>Dibenz(ah)anthracene</b> | 0.007 ± 0.0063 |                                       |
| <b>Benzo(ghi)perylene</b>   | 0.054 ± 0.0064 |                                       |
| <b>Total PAHs</b>           | 0.456 ± 0.0385 |                                       |
| <b>Naphthalene</b>          | 0.064 ± 0.0155 |                                       |
| <b>Acenaphthylene</b>       | 0.000 ± 0.0000 |                                       |
| <b>Acenaphthene</b>         | 0.003 ± 0.0033 |                                       |
| <b>Fluorene</b>             | 0.023 ± 0.0017 |                                       |
| <b>Phenanthrene</b>         | 0.068 ± 0.0100 |                                       |
| <b>Antracene</b>            | 0.013 ± 0.0015 |                                       |
| <b>Fluorantene</b>          | 0.024 ± 0.0035 | Paper mill waste, 500 °C <sup>4</sup> |
| <b>Pyrene</b>               | 0.040 ± 0.0098 |                                       |
| <b>Benz(a)anthracene</b>    | 0.015 ± 0.0032 |                                       |
| <b>Chrysene</b>             | 0.016 ± 0.0072 |                                       |
| <b>Benzo[b]fluoranthene</b> | 0.010 ± 0.0057 |                                       |
| <b>Benzo(k)fluorantene</b>  | 0.010 ± 0.0038 |                                       |
| <b>Benzo(a)pyrene</b>       | 0.021 ± 0.0097 |                                       |
| <b>Indeno(123cd)pyrene</b>  | 0.015 ± 0.0060 |                                       |

|                             |                |                                       |
|-----------------------------|----------------|---------------------------------------|
| <b>Dibenz(ah)anthracene</b> | 0.002 ± 0.0035 |                                       |
| <b>Benzo(ghi)perylene</b>   | 0.023 ± 0.0096 |                                       |
| <b>Total PAHs</b>           | 0.348 ± 0.0662 |                                       |
| <b>Naphthalene</b>          | 0.063 ± 0.0000 |                                       |
| <b>Acenaphthylene</b>       | 0.000 ± 0.0000 |                                       |
| <b>Acenaphthene</b>         | 0.004 ± 0.0000 |                                       |
| <b>Fluorene</b>             | 0.024 ± 0.0000 |                                       |
| <b>Phenanthrene</b>         | 0.064 ± 0.0000 |                                       |
| <b>Antracene</b>            | 0.013 ± 0.0000 |                                       |
| <b>Fluorantene</b>          | 0.020 ± 0.0000 |                                       |
| <b>Pyrene</b>               | 0.028 ± 0.0000 |                                       |
| <b>Benz(a)anthracene</b>    | 0.010 ± 0.0000 | Paper mill waste, 600 °C <sup>4</sup> |
| <b>Chrysene</b>             | 0.012 ± 0.0000 |                                       |
| <b>Benzo[b]fluoranthene</b> | 0.006 ± 0.0000 |                                       |
| <b>Benzo(k)fluorantene</b>  | 0.006 ± 0.0000 |                                       |
| <b>Benzo(a)pyrene</b>       | 0.010 ± 0.0000 |                                       |
| <b>Indeno(123cd)pyrene</b>  | 0.007 ± 0.0000 |                                       |
| <b>Dibenz(ah)anthracene</b> | 0.000 ± 0.0000 |                                       |
| <b>Benzo(ghi)perylene</b>   | 0.009 ± 0.0000 |                                       |
| <b>Total PAHs</b>           | 0.276 ± 0.0000 |                                       |
| <b>Naphthalene</b>          | 0.214 ± 0.0131 |                                       |
| <b>Acenaphthylene</b>       | 0.000 ± 0.0000 |                                       |
| <b>Acenaphthene</b>         | 0.075 ± 0.0063 |                                       |
| <b>Fluorene</b>             | 0.239 ± 0.0060 |                                       |
| <b>Phenanthrene</b>         | 0.269 ± 0.0142 |                                       |
| <b>Antracene</b>            | 0.075 ± 0.0049 |                                       |
| <b>Fluorantene</b>          | 0.108 ± 0.0066 |                                       |
| <b>Pyrene</b>               | 0.180 ± 0.0026 |                                       |
| <b>Benz(a)anthracene</b>    | 0.070 ± 0.0034 | Corn stover, 350 °C <sup>4</sup>      |
| <b>Chrysene</b>             | 0.111 ± 0.0054 |                                       |
| <b>Benzo[b]fluoranthene</b> | 0.027 ± 0.0052 |                                       |
| <b>Benzo(k)fluorantene</b>  | 0.028 ± 0.0065 |                                       |
| <b>Benzo(a)pyrene</b>       | 0.085 ± 0.0009 |                                       |
| <b>Indeno(123cd)pyrene</b>  | 0.065 ± 0.0073 |                                       |
| <b>Dibenz(ah)anthracene</b> | 0.000 ± 0.0000 |                                       |
| <b>Benzo(ghi)perylene</b>   | 0.062 ± 0.0084 |                                       |
| <b>Total PAHs</b>           | 1.609 ± 0.0146 |                                       |
| <b>Naphthalene</b>          | 0.655 ± 0.1850 | Corn stover, 450 °C <sup>4</sup>      |
| <b>Acenaphthylene</b>       | 0.000 ± 0.0000 |                                       |

|                             |                |                                  |
|-----------------------------|----------------|----------------------------------|
| <b>Acenaphthene</b>         | 0.000 ± 0.0000 |                                  |
| <b>Fluorene</b>             | 0.056 ± 0.0029 |                                  |
| <b>Phenanthrene</b>         | 0.451 ± 0.0309 |                                  |
| <b>Antracene</b>            | 0.079 ± 0.0025 |                                  |
| <b>Fluorantene</b>          | 0.116 ± 0.0069 |                                  |
| <b>Pyrene</b>               | 0.144 ± 0.0111 |                                  |
| <b>Benz(a)antracene</b>     | 0.083 ± 0.0067 |                                  |
| <b>Chrysene</b>             | 0.112 ± 0.0076 |                                  |
| <b>Benzo[b]fluoranthene</b> | 0.037 ± 0.0066 |                                  |
| <b>Benzo(k)fluorantene</b>  | 0.045 ± 0.0050 |                                  |
| <b>Benzo(a)pyrene</b>       | 0.077 ± 0.0087 |                                  |
| <b>Indeno(123cd)pyrene</b>  | 0.049 ± 0.0060 |                                  |
| <b>Dibenz(ah)antracene</b>  | 0.003 ± 0.0054 |                                  |
| <b>Benzo(ghi)perylene</b>   | 0.050 ± 0.0063 |                                  |
| <b>Total PAHs</b>           | 1.959 ± 0.2747 |                                  |
| <b>Naphthalene</b>          | 0.833 ± 0.1677 |                                  |
| <b>Acenaphtylene</b>        | 0.010 ± 0.0086 |                                  |
| <b>Acenaphthene</b>         | 0.008 ± 0.0137 |                                  |
| <b>Fluorene</b>             | 0.055 ± 0.0033 |                                  |
| <b>Phenanthrene</b>         | 0.313 ± 0.1562 |                                  |
| <b>Antracene</b>            | 0.052 ± 0.0268 |                                  |
| <b>Fluorantene</b>          | 0.082 ± 0.0315 |                                  |
| <b>Pyrene</b>               | 0.102 ± 0.0453 |                                  |
| <b>Benz(a)antracene</b>     | 0.051 ± 0.0307 | Corn stover, 550 °C <sup>4</sup> |
| <b>Chrysene</b>             | 0.068 ± 0.0474 |                                  |
| <b>Benzo[b]fluoranthene</b> | 0.025 ± 0.0082 |                                  |
| <b>Benzo(k)fluorantene</b>  | 0.036 ± 0.0122 |                                  |
| <b>Benzo(a)pyrene</b>       | 0.054 ± 0.0234 |                                  |
| <b>Indeno(123cd)pyrene</b>  | 0.036 ± 0.0113 |                                  |
| <b>Dibenz(ah)antracene</b>  | 0.000 ± 0.0000 |                                  |
| <b>Benzo(ghi)perylene</b>   | 0.045 ± 0.0106 |                                  |
| <b>Total PAHs</b>           | 1.770 ± 0.2553 |                                  |
| <b>Naphthalene</b>          | 1.166 ± 0.0667 |                                  |
| <b>Acenaphtylene</b>        | 0.071 ± 0.0141 |                                  |
| <b>Acenaphthene</b>         | 0.017 ± 0.0039 |                                  |
| <b>Fluorene</b>             | 0.045 ± 0.0074 | Wheat straw, 450 °C <sup>4</sup> |
| <b>Phenanthrene</b>         | 0.174 ± 0.0161 |                                  |
| <b>Antracene</b>            | 0.039 ± 0.0068 |                                  |
| <b>Fluorantene</b>          | 0.086 ± 0.0148 |                                  |

|                             |                |                                         |
|-----------------------------|----------------|-----------------------------------------|
| <b>Pyrene</b>               | 0.087 ± 0.0074 |                                         |
| <b>Benz(a)anthracene</b>    | 0.016 ± 0.0032 |                                         |
| <b>Chrysene</b>             | 0.024 ± 0.0052 |                                         |
| <b>Benzo[b]fluoranthene</b> | 0.017 ± 0.0072 |                                         |
| <b>Benzo(k)fluorantene</b>  | 0.009 ± 0.0081 |                                         |
| <b>Benzo(a)pyrene</b>       | 0.015 ± 0.0035 |                                         |
| <b>Indeno(123cd)pyrene</b>  | 0.011 ± 0.0033 |                                         |
| <b>Dibenz(ah)anthracene</b> | 0.000 ± 0.0000 |                                         |
| <b>Benzo(ghi)perylene</b>   | 0.017 ± 0.0045 |                                         |
| <b>Total PAHs</b>           | 1.793 ± 0.1148 |                                         |
| <b>Naphthalene</b>          | 0.140 ± 0.0113 |                                         |
| <b>Acenaphthylene</b>       | 0.000 ± 0.0000 |                                         |
| <b>Acenaphthene</b>         | 0.000 ± 0.0000 |                                         |
| <b>Fluorene</b>             | 0.011 ± 0.0035 |                                         |
| <b>Phenanthrene</b>         | 0.079 ± 0.0097 |                                         |
| <b>Antracene</b>            | 0.009 ± 0.0005 |                                         |
| <b>Fluorantene</b>          | 0.022 ± 0.0029 |                                         |
| <b>Pyrene</b>               | 0.027 ± 0.0027 |                                         |
| <b>Benz(a)anthracene</b>    | 0.012 ± 0.0030 | Rubberwood sawdust, 500 °C <sup>4</sup> |
| <b>Chrysene</b>             | 0.015 ± 0.0013 |                                         |
| <b>Benzo[b]fluoranthene</b> | 0.000 ± 0.0000 |                                         |
| <b>Benzo(k)fluorantene</b>  | 0.000 ± 0.0000 |                                         |
| <b>Benzo(a)pyrene</b>       | 0.000 ± 0.0000 |                                         |
| <b>Indeno(123cd)pyrene</b>  | 0.000 ± 0.0000 |                                         |
| <b>Dibenz(ah)anthracene</b> | 0.000 ± 0.0000 |                                         |
| <b>Benzo(ghi)perylene</b>   | 0.000 ± 0.0000 |                                         |
| <b>Total PAHs</b>           | 0.315 ± 0.0304 |                                         |
| <b>Naphthalene</b>          | 0.069 ± 0.0143 |                                         |
| <b>Acenaphthylene</b>       | 0.000 ± 0.0000 |                                         |
| <b>Acenaphthene</b>         | 0.002 ± 0.0037 |                                         |
| <b>Fluorene</b>             | 0.002 ± 0.0027 |                                         |
| <b>Phenanthrene</b>         | 0.035 ± 0.0073 |                                         |
| <b>Antracene</b>            | 0.003 ± 0.0005 | Rubberwood sawdust, 840 °C <sup>4</sup> |
| <b>Fluorantene</b>          | 0.010 ± 0.0034 |                                         |
| <b>Pyrene</b>               | 0.013 ± 0.0045 |                                         |
| <b>Benz(a)anthracene</b>    | 0.001 ± 0.0012 |                                         |
| <b>Chrysene</b>             | 0.005 ± 0.0017 |                                         |
| <b>Benzo[b]fluoranthene</b> | 0.000 ± 0.0000 |                                         |
| <b>Benzo(k)fluorantene</b>  | 0.000 ± 0.0000 |                                         |

|                             |                |                          |
|-----------------------------|----------------|--------------------------|
| <b>Benzo(a)pyrene</b>       | 0.000 ± 0.0000 |                          |
| <b>Indeno(123cd)pyrene</b>  | 0.000 ± 0.0000 |                          |
| <b>Dibenz(ah)anthracene</b> | 0.000 ± 0.0000 |                          |
| <b>Benzo(ghi)perylene</b>   | 0.000 ± 0.0000 |                          |
| <b>Total PAHs</b>           | 0.139 ± 0.0384 |                          |
| <b>Naphthalene</b>          | 0.040 ± 0.0013 |                          |
| <b>Acenaphthylene</b>       | 0.000 ± 0.0000 |                          |
| <b>Acenaphthene</b>         | 0.001 ± 0.0009 |                          |
| <b>Fluorene</b>             | 0.005 ± 0.0013 |                          |
| <b>Phenanthrene</b>         | 0.027 ± 0.0006 |                          |
| <b>Antracene</b>            | 0.001 ± 0.0016 |                          |
| <b>Fluorantene</b>          | 0.009 ± 0.0013 |                          |
| <b>Pyrene</b>               | 0.009 ± 0.0009 |                          |
| <b>Benz(a)anthracene</b>    | 0.001 ± 0.0001 | Oak, 250 °C <sup>4</sup> |
| <b>Chrysene</b>             | 0.004 ± 0.0007 |                          |
| <b>Benzo[b]fluoranthene</b> | 0.000 ± 0.0000 |                          |
| <b>Benzo(k)fluorantene</b>  | 0.000 ± 0.0000 |                          |
| <b>Benzo(a)pyrene</b>       | 0.000 ± 0.0000 |                          |
| <b>Indeno(123cd)pyrene</b>  | 0.000 ± 0.0006 |                          |
| <b>Dibenz(ah)anthracene</b> | 0.000 ± 0.0000 |                          |
| <b>Benzo(ghi)perylene</b>   | 0.000 ± 0.0000 |                          |
| <b>Total PAHs</b>           | 0.096 ± 0.0030 |                          |
| <b>Naphthalene</b>          | 0.037 ± 0.0043 |                          |
| <b>Acenaphthylene</b>       | 0.000 ± 0.0000 |                          |
| <b>Acenaphthene</b>         | 0.003 ± 0.0011 |                          |
| <b>Fluorene</b>             | 0.019 ± 0.0016 |                          |
| <b>Phenanthrene</b>         | 0.031 ± 0.0012 |                          |
| <b>Antracene</b>            | 0.002 ± 0.0013 |                          |
| <b>Fluorantene</b>          | 0.017 ± 0.0036 |                          |
| <b>Pyrene</b>               | 0.016 ± 0.0027 |                          |
| <b>Benz(a)anthracene</b>    | 0.003 ± 0.0017 | Oak, 400 °C <sup>4</sup> |
| <b>Chrysene</b>             | 0.006 ± 0.0021 |                          |
| <b>Benzo[b]fluoranthene</b> | 0.002 ± 0.0041 |                          |
| <b>Benzo(k)fluorantene</b>  | 0.001 ± 0.0025 |                          |
| <b>Benzo(a)pyrene</b>       | 0.002 ± 0.0041 |                          |
| <b>Indeno(123cd)pyrene</b>  | 0.001 ± 0.0020 |                          |
| <b>Dibenz(ah)anthracene</b> | 0.000 ± 0.0000 |                          |
| <b>Benzo(ghi)perylene</b>   | 0.001 ± 0.0021 |                          |
| <b>Total PAHs</b>           | 0.141 ± 0.0292 |                          |

|                             |                |                           |
|-----------------------------|----------------|---------------------------|
| <b>Naphthalene</b>          | 0.059 ± 0.0071 |                           |
| <b>Acenaphthylene</b>       | 0.000 ± 0.0000 |                           |
| <b>Acenaphthene</b>         | 0.000 ± 0.0000 |                           |
| <b>Fluorene</b>             | 0.007 ± 0.0037 |                           |
| <b>Phenanthrene</b>         | 0.054 ± 0.0082 |                           |
| <b>Antracene</b>            | 0.007 ± 0.0010 |                           |
| <b>Fluorantene</b>          | 0.016 ± 0.0030 |                           |
| <b>Pyrene</b>               | 0.015 ± 0.0015 |                           |
| <b>Benz(a)anthracene</b>    | 0.006 ± 0.0005 | Oak, 650 °C <sup>4</sup>  |
| <b>Chrysene</b>             | 0.009 ± 0.0003 |                           |
| <b>Benzo[b]fluoranthene</b> | 0.001 ± 0.0022 |                           |
| <b>Benzo(k)fluorantene</b>  | 0.001 ± 0.0018 |                           |
| <b>Benzo(a)pyrene</b>       | 0.002 ± 0.0028 |                           |
| <b>Indeno(123cd)pyrene</b>  | 0.004 ± 0.0003 |                           |
| <b>Dibenz(ah)anthracene</b> | 0.000 ± 0.0000 |                           |
| <b>Benzo(ghi)perylene</b>   | 0.003 ± 0.0016 |                           |
| <b>Total PAHs</b>           | 0.183 ± 0.0201 |                           |
| <b>Naphthalene</b>          | 0.069 ± 0.0073 |                           |
| <b>Acenaphthylene</b>       | 0.000 ± 0.0000 |                           |
| <b>Acenaphthene</b>         | 0.000 ± 0.0000 |                           |
| <b>Fluorene</b>             | 0.009 ± 0.0079 |                           |
| <b>Phenanthrene</b>         | 0.055 ± 0.0042 |                           |
| <b>Antracene</b>            | 0.002 ± 0.0020 |                           |
| <b>Fluorantene</b>          | 0.022 ± 0.0027 |                           |
| <b>Pyrene</b>               | 0.022 ± 0.0024 |                           |
| <b>Benz(a)anthracene</b>    | 0.003 ± 0.0007 | Pine, 250 °C <sup>4</sup> |
| <b>Chrysene</b>             | 0.007 ± 0.0020 |                           |
| <b>Benzo[b]fluoranthene</b> | 0.000 ± 0.0000 |                           |
| <b>Benzo(k)fluorantene</b>  | 0.000 ± 0.0000 |                           |
| <b>Benzo(a)pyrene</b>       | 0.000 ± 0.0000 |                           |
| <b>Indeno(123cd)pyrene</b>  | 0.000 ± 0.0000 |                           |
| <b>Dibenz(ah)anthracene</b> | 0.000 ± 0.0000 |                           |
| <b>Benzo(ghi)perylene</b>   | 0.000 ± 0.0000 |                           |
| <b>Total PAHs</b>           | 0.189 ± 0.0145 |                           |
| <b>Naphthalene</b>          | 0.113 ± 0.0447 |                           |
| <b>Acenaphthylene</b>       | 0.000 ± 0.0000 |                           |
| <b>Acenaphthene</b>         | 0.000 ± 0.0000 | Pine, 400 °C <sup>4</sup> |
| <b>Fluorene</b>             | 0.011 ± 0.0101 |                           |
| <b>Phenanthrene</b>         | 0.087 ± 0.0305 |                           |



|                             |                |                            |
|-----------------------------|----------------|----------------------------|
| <b>Antracene</b>            | 0.004 ± 0.0042 |                            |
| <b>Fluorantene</b>          | 0.028 ± 0.0113 |                            |
| <b>Pyrene</b>               | 0.031 ± 0.0163 |                            |
| <b>Benz(a)antracene</b>     | 0.004 ± 0.0027 |                            |
| <b>Chrysene</b>             | 0.012 ± 0.0078 |                            |
| <b>Benzo[b]fluoranthene</b> | 0.000 ± 0.0000 |                            |
| <b>Benzo(k)fluorantene</b>  | 0.000 ± 0.0000 |                            |
| <b>Benzo(a)pyrene</b>       | 0.000 ± 0.0000 |                            |
| <b>Indeno(123cd)pyrene</b>  | 0.000 ± 0.0000 |                            |
| <b>Dibenz(ah)antracene</b>  | 0.000 ± 0.0000 |                            |
| <b>Benzo(ghi)perylene</b>   | 0.000 ± 0.0000 |                            |
| <b>Total PAHs</b>           | 0.289 ± 0.1164 |                            |
| <b>Naphthalene</b>          | 0.050 ± 0.0051 |                            |
| <b>Acenaphthylene</b>       | 0.000 ± 0.0000 |                            |
| <b>Acenaphthene</b>         | 0.000 ± 0.0000 |                            |
| <b>Fluorene</b>             | 0.002 ± 0.0035 |                            |
| <b>Phenanthrene</b>         | 0.042 ± 0.0081 |                            |
| <b>Antracene</b>            | 0.003 ± 0.0011 |                            |
| <b>Fluorantene</b>          | 0.013 ± 0.0037 |                            |
| <b>Pyrene</b>               | 0.013 ± 0.0037 |                            |
| <b>Benz(a)antracene</b>     | 0.004 ± 0.0012 | Pine, 650 °C <sup>4</sup>  |
| <b>Chrysene</b>             | 0.007 ± 0.0020 |                            |
| <b>Benzo[b]fluoranthene</b> | 0.000 ± 0.0000 |                            |
| <b>Benzo(k)fluorantene</b>  | 0.000 ± 0.0000 |                            |
| <b>Benzo(a)pyrene</b>       | 0.000 ± 0.0000 |                            |
| <b>Indeno(123cd)pyrene</b>  | 0.000 ± 0.0000 |                            |
| <b>Dibenz(ah)antracene</b>  | 0.000 ± 0.0000 |                            |
| <b>Benzo(ghi)perylene</b>   | 0.000 ± 0.0000 |                            |
| <b>Total PAHs</b>           | 0.133 ± 0.0241 |                            |
| <b>Naphthalene</b>          | 0.050 ± 0.0017 |                            |
| <b>Acenaphthylene</b>       | 0.000 ± 0.0000 |                            |
| <b>Acenaphthene</b>         | 0.000 ± 0.0000 |                            |
| <b>Fluorene</b>             | 0.004 ± 0.0013 |                            |
| <b>Phenanthrene</b>         | 0.046 ± 0.0033 | Grass, 250 °C <sup>4</sup> |
| <b>Antracene</b>            | 0.001 ± 0.0010 |                            |
| <b>Fluorantene</b>          | 0.012 ± 0.0015 |                            |
| <b>Pyrene</b>               | 0.010 ± 0.0007 |                            |
| <b>Benz(a)antracene</b>     | 0.002 ± 0.0006 |                            |
| <b>Chrysene</b>             | 0.008 ± 0.0014 |                            |

|                             |                |                            |
|-----------------------------|----------------|----------------------------|
| <b>Benzo[b]fluoranthene</b> | 0.000 ± 0.0000 |                            |
| <b>Benzo(k)fluorantene</b>  | 0.000 ± 0.0000 |                            |
| <b>Benzo(a)pyrene</b>       | 0.000 ± 0.0000 |                            |
| <b>Indeno(123cd)pyrene</b>  | 0.000 ± 0.0000 |                            |
| <b>Dibenz(ah)anthracene</b> | 0.000 ± 0.0000 |                            |
| <b>Benzo(ghi)perylene</b>   | 0.000 ± 0.0000 |                            |
| <b>Total PAHs</b>           | 0.132 ± 0.0081 |                            |
| <b>Naphthalene</b>          | 0.040 ± 0.0111 |                            |
| <b>Acenaphthylene</b>       | 0.000 ± 0.0000 |                            |
| <b>Acenaphthene</b>         | 0.000 ± 0.0000 |                            |
| <b>Fluorene</b>             | 0.018 ± 0.0037 |                            |
| <b>Phenanthrene</b>         | 0.025 ± 0.0062 |                            |
| <b>Antracene</b>            | 0.000 ± 0.0000 |                            |
| <b>Fluorantene</b>          | 0.013 ± 0.0031 |                            |
| <b>Pyrene</b>               | 0.014 ± 0.0016 |                            |
| <b>Benz(a)anthracene</b>    | 0.002 ± 0.0005 | Grass, 400 °C <sup>4</sup> |
| <b>Chrysene</b>             | 0.005 ± 0.0009 |                            |
| <b>Benzo[b]fluoranthene</b> | 0.002 ± 0.0018 |                            |
| <b>Benzo(k)fluorantene</b>  | 0.001 ± 0.0014 |                            |
| <b>Benzo(a)pyrene</b>       | 0.002 ± 0.0016 |                            |
| <b>Indeno(123cd)pyrene</b>  | 0.002 ± 0.0013 |                            |
| <b>Dibenz(ah)anthracene</b> | 0.000 ± 0.0000 |                            |
| <b>Benzo(ghi)perylene</b>   | 0.002 ± 0.0003 |                            |
| <b>Total PAHs</b>           | 0.126 ± 0.0317 |                            |
| <b>Naphthalene</b>          | 0.110 ± 0.1122 |                            |
| <b>Acenaphthylene</b>       | 0.000 ± 0.0000 |                            |
| <b>Acenaphthene</b>         | 0.000 ± 0.0000 |                            |
| <b>Fluorene</b>             | 0.000 ± 0.0000 |                            |
| <b>Phenanthrene</b>         | 0.069 ± 0.0715 |                            |
| <b>Antracene</b>            | 0.007 ± 0.0055 |                            |
| <b>Fluorantene</b>          | 0.024 ± 0.0324 |                            |
| <b>Pyrene</b>               | 0.027 ± 0.0404 | Grass, 650 °C <sup>4</sup> |
| <b>Benz(a)anthracene</b>    | 0.008 ± 0.0096 |                            |
| <b>Chrysene</b>             | 0.013 ± 0.0143 |                            |
| <b>Benzo[b]fluoranthene</b> | 0.008 ± 0.0072 |                            |
| <b>Benzo(k)fluorantene</b>  | 0.005 ± 0.0047 |                            |
| <b>Benzo(a)pyrene</b>       | 0.008 ± 0.0056 |                            |
| <b>Indeno(123cd)pyrene</b>  | 0.006 ± 0.0047 |                            |
| <b>Dibenz(ah)anthracene</b> | 0.000 ± 0.0000 |                            |

|                             |                |                                      |
|-----------------------------|----------------|--------------------------------------|
| <b>Benzo(ghi)perylene</b>   | 0.006 ± 0.0074 |                                      |
| <b>Total PAHs</b>           | 0.291 ± 0.0608 |                                      |
| <b>Naphthalene</b>          | 0.070 ± 0.0036 |                                      |
| <b>Acenaphthylene</b>       | 0.000 ± 0.0000 |                                      |
| <b>Acenaphthene</b>         | 0.000 ± 0.0000 |                                      |
| <b>Fluorene</b>             | 0.009 ± 0.0021 |                                      |
| <b>Phenanthrene</b>         | 0.063 ± 0.0005 |                                      |
| <b>Antracene</b>            | 0.004 ± 0.0016 |                                      |
| <b>Fluorantene</b>          | 0.023 ± 0.0000 |                                      |
| <b>Pyrene</b>               | 0.020 ± 0.0004 |                                      |
| <b>Benz(a)anthracene</b>    | 0.003 ± 0.0002 | Oak aged 1 year, 250 °C <sup>4</sup> |
| <b>Chrysene</b>             | 0.008 ± 0.0010 |                                      |
| <b>Benzo[b]fluoranthene</b> | 0.005 ± 0.0031 |                                      |
| <b>Benzo(k)fluorantene</b>  | 0.005 ± 0.0015 |                                      |
| <b>Benzo(a)pyrene</b>       | 0.000 ± 0.0000 |                                      |
| <b>Indeno(123cd)pyrene</b>  | 0.000 ± 0.0000 |                                      |
| <b>Dibenz(ah)anthracene</b> | 0.000 ± 0.0000 |                                      |
| <b>Benzo(ghi)perylene</b>   | 0.000 ± 0.0000 |                                      |
| <b>Total PAHs</b>           | 0.210 ± 0.0078 |                                      |
| <b>Naphthalene</b>          | 0.074 ± 0.0069 |                                      |
| <b>Acenaphthylene</b>       | 0.000 ± 0.0000 |                                      |
| <b>Acenaphthene</b>         | 0.000 ± 0.0000 |                                      |
| <b>Fluorene</b>             | 0.011 ± 0.0002 |                                      |
| <b>Phenanthrene</b>         | 0.049 ± 0.0046 |                                      |
| <b>Antracene</b>            | 0.004 ± 0.0001 |                                      |
| <b>Fluorantene</b>          | 0.021 ± 0.0037 |                                      |
| <b>Pyrene</b>               | 0.020 ± 0.0016 |                                      |
| <b>Benz(a)anthracene</b>    | 0.003 ± 0.0009 | Oak aged 1 year, 400 °C <sup>4</sup> |
| <b>Chrysene</b>             | 0.008 ± 0.0004 |                                      |
| <b>Benzo[b]fluoranthene</b> | 0.000 ± 0.0000 |                                      |
| <b>Benzo(k)fluorantene</b>  | 0.000 ± 0.0000 |                                      |
| <b>Benzo(a)pyrene</b>       | 0.000 ± 0.0000 |                                      |
| <b>Indeno(123cd)pyrene</b>  | 0.000 ± 0.0000 |                                      |
| <b>Dibenz(ah)anthracene</b> | 0.000 ± 0.0000 |                                      |
| <b>Benzo(ghi)perylene</b>   | 0.000 ± 0.0000 |                                      |
| <b>Total PAHs</b>           | 0.190 ± 0.0017 |                                      |
| <b>Naphthalene</b>          | 0.157 ± 0.0330 |                                      |
| <b>Acenaphthylene</b>       | 0.000 ± 0.0000 | Oak aged 1 year, 650 °C <sup>4</sup> |
| <b>Acenaphthene</b>         | 0.000 ± 0.0000 |                                      |

|                             |                |                                       |
|-----------------------------|----------------|---------------------------------------|
| <b>Fluorene</b>             | 0.000 ± 0.0000 |                                       |
| <b>Phenanthrene</b>         | 0.081 ± 0.0199 |                                       |
| <b>Antracene</b>            | 0.006 ± 0.0013 |                                       |
| <b>Fluorantene</b>          | 0.026 ± 0.0048 |                                       |
| <b>Pyrene</b>               | 0.025 ± 0.0051 |                                       |
| <b>Benz(a)antracene</b>     | 0.006 ± 0.0014 |                                       |
| <b>Chrysene</b>             | 0.012 ± 0.0034 |                                       |
| <b>Benzo[b]fluoranthene</b> | 0.000 ± 0.0000 |                                       |
| <b>Benzo(k)fluorantene</b>  | 0.000 ± 0.0000 |                                       |
| <b>Benzo(a)pyrene</b>       | 0.000 ± 0.0000 |                                       |
| <b>Indeno(123cd)pyrene</b>  | 0.003 ± 0.0041 |                                       |
| <b>Dibenz(ah)antracene</b>  | 0.000 ± 0.0000 |                                       |
| <b>Benzo(ghi)perylene</b>   | 0.005 ± 0.0001 |                                       |
| <b>Total PAHs</b>           | 0.321 ± 0.0731 |                                       |
| <b>Naphthalene</b>          | 0.060 ± 0.0346 |                                       |
| <b>Acenaphthylene</b>       | 0.000 ± 0.0000 |                                       |
| <b>Acenaphthene</b>         | 0.000 ± 0.0000 |                                       |
| <b>Fluorene</b>             | 0.000 ± 0.0000 |                                       |
| <b>Phenanthrene</b>         | 0.035 ± 0.0173 |                                       |
| <b>Antracene</b>            | 0.000 ± 0.0007 |                                       |
| <b>Fluorantene</b>          | 0.014 ± 0.0064 |                                       |
| <b>Pyrene</b>               | 0.014 ± 0.0075 |                                       |
| <b>Benz(a)antracene</b>     | 0.003 ± 0.0011 | Pine aged 1 year, 250 °C <sup>4</sup> |
| <b>Chrysene</b>             | 0.006 ± 0.0034 |                                       |
| <b>Benzo[b]fluoranthene</b> | 0.000 ± 0.0000 |                                       |
| <b>Benzo(k)fluorantene</b>  | 0.000 ± 0.0000 |                                       |
| <b>Benzo(a)pyrene</b>       | 0.000 ± 0.0000 |                                       |
| <b>Indeno(123cd)pyrene</b>  | 0.000 ± 0.0000 |                                       |
| <b>Dibenz(ah)antracene</b>  | 0.000 ± 0.0000 |                                       |
| <b>Benzo(ghi)perylene</b>   | 0.002 ± 0.0027 |                                       |
| <b>Total PAHs</b>           | 0.133 ± 0.0722 |                                       |
| <b>Naphthalene</b>          | 0.075 ± 0.0046 |                                       |
| <b>Acenaphthylene</b>       | 0.000 ± 0.0000 |                                       |
| <b>Acenaphthene</b>         | 0.000 ± 0.0000 |                                       |
| <b>Fluorene</b>             | 0.005 ± 0.0065 | Pine aged 1 year, 400 °C <sup>4</sup> |
| <b>Phenanthrene</b>         | 0.049 ± 0.0004 |                                       |
| <b>Antracene</b>            | 0.002 ± 0.0001 |                                       |
| <b>Fluorantene</b>          | 0.019 ± 0.0001 |                                       |
| <b>Pyrene</b>               | 0.021 ± 0.0044 |                                       |

|                             |                |                                        |
|-----------------------------|----------------|----------------------------------------|
| <b>Benz(a)anthracene</b>    | 0.004 ± 0.0014 |                                        |
| <b>Chrysene</b>             | 0.008 ± 0.0014 |                                        |
| <b>Benzo[b]fluoranthene</b> | 0.000 ± 0.0000 |                                        |
| <b>Benzo(k)fluorantene</b>  | 0.000 ± 0.0000 |                                        |
| <b>Benzo(a)pyrene</b>       | 0.000 ± 0.0000 |                                        |
| <b>Indeno(123cd)pyrene</b>  | 0.000 ± 0.0000 |                                        |
| <b>Dibenz(ah)anthracene</b> | 0.000 ± 0.0000 |                                        |
| <b>Benzo(ghi)perylene</b>   | 0.000 ± 0.0000 |                                        |
| <b>Total PAHs</b>           | 0.183 ± 0.0096 |                                        |
| <b>Naphthalene</b>          | 0.078 ± 0.0507 |                                        |
| <b>Acenaphthylene</b>       | 0.000 ± 0.0000 |                                        |
| <b>Acenaphthene</b>         | 0.000 ± 0.0000 |                                        |
| <b>Fluorene</b>             | 0.025 ± 0.0355 |                                        |
| <b>Phenanthrene</b>         | 0.050 ± 0.0382 |                                        |
| <b>Antracene</b>            | 0.004 ± 0.0028 |                                        |
| <b>Fluorantene</b>          | 0.018 ± 0.0146 |                                        |
| <b>Pyrene</b>               | 0.016 ± 0.0115 |                                        |
| <b>Benz(a)anthracene</b>    | 0.004 ± 0.0024 | Pine aged 1 year, 650 °C <sup>4</sup>  |
| <b>Chrysene</b>             | 0.006 ± 0.0039 |                                        |
| <b>Benzo[b]fluoranthene</b> | 0.000 ± 0.0000 |                                        |
| <b>Benzo(k)fluorantene</b>  | 0.000 ± 0.0000 |                                        |
| <b>Benzo(a)pyrene</b>       | 0.000 ± 0.0000 |                                        |
| <b>Indeno(123cd)pyrene</b>  | 0.001 ± 0.0020 |                                        |
| <b>Dibenz(ah)anthracene</b> | 0.000 ± 0.0000 |                                        |
| <b>Benzo(ghi)perylene</b>   | 0.002 ± 0.0031 |                                        |
| <b>Total PAHs</b>           | 0.204 ± 0.1648 |                                        |
| <b>Naphthalene</b>          | 0.075 ± 0.0332 |                                        |
| <b>Acenaphthylene</b>       | 0.000 ± 0.0000 |                                        |
| <b>Acenaphthene</b>         | 0.000 ± 0.0000 |                                        |
| <b>Fluorene</b>             | 0.007 ± 0.0100 |                                        |
| <b>Phenanthrene</b>         | 0.060 ± 0.0182 |                                        |
| <b>Antracene</b>            | 0.003 ± 0.0007 |                                        |
| <b>Fluorantene</b>          | 0.021 ± 0.0112 | Grass aged 1 year, 250 °C <sup>4</sup> |
| <b>Pyrene</b>               | 0.018 ± 0.0067 |                                        |
| <b>Benz(a)anthracene</b>    | 0.003 ± 0.0012 |                                        |
| <b>Chrysene</b>             | 0.008 ± 0.0040 |                                        |
| <b>Benzo[b]fluoranthene</b> | 0.000 ± 0.0000 |                                        |
| <b>Benzo(k)fluorantene</b>  | 0.000 ± 0.0000 |                                        |
| <b>Benzo(a)pyrene</b>       | 0.000 ± 0.0000 |                                        |

|                             |                |                                        |
|-----------------------------|----------------|----------------------------------------|
| <b>Indeno(123cd)pyrene</b>  | 0.001 ± 0.0013 |                                        |
| <b>Dibenz(ah)anthracene</b> | 0.000 ± 0.0000 |                                        |
| <b>Benzo(ghi)perylene</b>   | 0.000 ± 0.0000 |                                        |
| <b>Total PAHs</b>           | 0.196 ± 0.0839 |                                        |
| <b>Naphthalene</b>          | 0.093 ± 0.0335 |                                        |
| <b>Acenaphthylene</b>       | 0.000 ± 0.0000 |                                        |
| <b>Acenaphthene</b>         | 0.000 ± 0.0000 |                                        |
| <b>Fluorene</b>             | 0.022 ± 0.0070 |                                        |
| <b>Phenanthrene</b>         | 0.071 ± 0.0179 |                                        |
| <b>Antracene</b>            | 0.002 ± 0.0035 |                                        |
| <b>Fluorantene</b>          | 0.037 ± 0.0146 |                                        |
| <b>Pyrene</b>               | 0.036 ± 0.0124 |                                        |
| <b>Benz(a)anthracene</b>    | 0.005 ± 0.0021 | Grass aged 1 year, 400 °C <sup>4</sup> |
| <b>Chrysene</b>             | 0.014 ± 0.0050 |                                        |
| <b>Benzo[b]fluoranthene</b> | 0.000 ± 0.0000 |                                        |
| <b>Benzo(k)fluorantene</b>  | 0.000 ± 0.0000 |                                        |
| <b>Benzo(a)pyrene</b>       | 0.004 ± 0.0054 |                                        |
| <b>Indeno(123cd)pyrene</b>  | 0.006 ± 0.0018 |                                        |
| <b>Dibenz(ah)anthracene</b> | 0.000 ± 0.0000 |                                        |
| <b>Benzo(ghi)perylene</b>   | 0.006 ± 0.0043 |                                        |
| <b>Total PAHs</b>           | 0.296 ± 0.1005 |                                        |
| <b>Naphthalene</b>          | 0.254 ± 0.0037 |                                        |
| <b>Acenaphthylene</b>       | 0.000 ± 0.0000 |                                        |
| <b>Acenaphthene</b>         | 0.000 ± 0.0000 |                                        |
| <b>Fluorene</b>             | 0.017 ± 0.0013 |                                        |
| <b>Phenanthrene</b>         | 0.156 ± 0.0124 |                                        |
| <b>Antracene</b>            | 0.014 ± 0.0011 |                                        |
| <b>Fluorantene</b>          | 0.043 ± 0.0055 |                                        |
| <b>Pyrene</b>               | 0.053 ± 0.0001 |                                        |
| <b>Benz(a)anthracene</b>    | 0.020 ± 0.0007 | Grass aged 1 year, 650 °C <sup>4</sup> |
| <b>Chrysene</b>             | 0.032 ± 0.0021 |                                        |
| <b>Benzo[b]fluoranthene</b> | 0.018 ± 0.0249 |                                        |
| <b>Benzo(k)fluorantene</b>  | 0.012 ± 0.0163 |                                        |
| <b>Benzo(a)pyrene</b>       | 0.027 ± 0.0039 |                                        |
| <b>Indeno(123cd)pyrene</b>  | 0.019 ± 0.0001 |                                        |
| <b>Dibenz(ah)anthracene</b> | 0.000 ± 0.0000 |                                        |
| <b>Benzo(ghi)perylene</b>   | 0.019 ± 0.0014 |                                        |
| <b>Total PAHs</b>           | 0.684 ± 0.0224 |                                        |
| <b>Naphthalene</b>          | 0.045 ± 0.0049 | Pine wood, 250 °C <sup>4</sup>         |

|                             |                |                                |
|-----------------------------|----------------|--------------------------------|
| <b>Acenaphthylene</b>       | 0.000 ± 0.0000 |                                |
| <b>Acenaphthene</b>         | 0.001 ± 0.0017 |                                |
| <b>Fluorene</b>             | 0.010 ± 0.0013 |                                |
| <b>Phenanthrene</b>         | 0.038 ± 0.0034 |                                |
| <b>Antracene</b>            | 0.002 ± 0.0019 |                                |
| <b>Fluorantene</b>          | 0.004 ± 0.0009 |                                |
| <b>Pyrene</b>               | 0.004 ± 0.0008 |                                |
| <b>Benz(a)antracene</b>     | 0.000 ± 0.0000 |                                |
| <b>Chrysene</b>             | 0.002 ± 0.0016 |                                |
| <b>Benzo[b]fluoranthene</b> | 0.000 ± 0.0000 |                                |
| <b>Benzo(k)fluorantene</b>  | 0.000 ± 0.0000 |                                |
| <b>Benzo(a)pyrene</b>       | 0.000 ± 0.0000 |                                |
| <b>Indeno(123cd)pyrene</b>  | 0.000 ± 0.0000 |                                |
| <b>Dibenz(ah)antracene</b>  | 0.000 ± 0.0000 |                                |
| <b>Benzo(ghi)perylene</b>   | 0.000 ± 0.0000 |                                |
| <b>Total PAHs</b>           | 0.105 ± 0.0096 |                                |
| <b>Naphthalene</b>          | 0.091 ± 0.0032 |                                |
| <b>Acenaphthylene</b>       | 0.000 ± 0.0000 |                                |
| <b>Acenaphthene</b>         | 0.002 ± 0.0037 |                                |
| <b>Fluorene</b>             | 0.014 ± 0.0029 |                                |
| <b>Phenanthrene</b>         | 0.062 ± 0.0075 |                                |
| <b>Antracene</b>            | 0.000 ± 0.0000 |                                |
| <b>Fluorantene</b>          | 0.008 ± 0.0014 |                                |
| <b>Pyrene</b>               | 0.005 ± 0.0011 |                                |
| <b>Benz(a)antracene</b>     | 0.000 ± 0.0000 | Pine wood, 350 °C <sup>4</sup> |
| <b>Chrysene</b>             | 0.000 ± 0.0000 |                                |
| <b>Benzo[b]fluoranthene</b> | 0.000 ± 0.0000 |                                |
| <b>Benzo(k)fluorantene</b>  | 0.000 ± 0.0000 |                                |
| <b>Benzo(a)pyrene</b>       | 0.000 ± 0.0000 |                                |
| <b>Indeno(123cd)pyrene</b>  | 0.000 ± 0.0000 |                                |
| <b>Dibenz(ah)antracene</b>  | 0.000 ± 0.0000 |                                |
| <b>Benzo(ghi)perylene</b>   | 0.000 ± 0.0000 |                                |
| <b>Total PAHs</b>           | 0.183 ± 0.0192 |                                |
| <b>Naphthalene</b>          | 0.034 ± 0.0047 |                                |
| <b>Acenaphthylene</b>       | 0.000 ± 0.0000 |                                |
| <b>Acenaphthene</b>         | 0.004 ± 0.0030 | Pine wood, 500 °C <sup>4</sup> |
| <b>Fluorene</b>             | 0.010 ± 0.0026 |                                |
| <b>Phenanthrene</b>         | 0.041 ± 0.0103 |                                |
| <b>Antracene</b>            | 0.003 ± 0.0021 |                                |

|                             |                |                                |
|-----------------------------|----------------|--------------------------------|
| <b>Fluorantene</b>          | 0.008 ± 0.0038 |                                |
| <b>Pyrene</b>               | 0.005 ± 0.0021 |                                |
| <b>Benz(a)antracene</b>     | 0.000 ± 0.0004 |                                |
| <b>Chrysene</b>             | 0.000 ± 0.0005 |                                |
| <b>Benzo[b]fluoranthene</b> | 0.000 ± 0.0000 |                                |
| <b>Benzo(k)fluorantene</b>  | 0.000 ± 0.0000 |                                |
| <b>Benzo(a)pyrene</b>       | 0.000 ± 0.0000 |                                |
| <b>Indeno(123cd)pyrene</b>  | 0.000 ± 0.0000 |                                |
| <b>Dibenz(ah)antracene</b>  | 0.000 ± 0.0000 |                                |
| <b>Benzo(ghi)perylene</b>   | 0.000 ± 0.0000 |                                |
| <b>Total PAHs</b>           | 0.106 ± 0.0202 |                                |
| <b>Naphthalene</b>          | 0.037 ± 0.0079 |                                |
| <b>Acenaphthylene</b>       | 0.000 ± 0.0000 |                                |
| <b>Acenaphthene</b>         | 0.000 ± 0.0000 |                                |
| <b>Fluorene</b>             | 0.008 ± 0.0007 |                                |
| <b>Phenanthrene</b>         | 0.029 ± 0.0010 |                                |
| <b>Antracene</b>            | 0.001 ± 0.0011 |                                |
| <b>Fluorantene</b>          | 0.003 ± 0.0005 |                                |
| <b>Pyrene</b>               | 0.003 ± 0.0010 |                                |
| <b>Benz(a)antracene</b>     | 0.000 ± 0.0000 | Pine wood, 600 °C <sup>4</sup> |
| <b>Chrysene</b>             | 0.000 ± 0.0000 |                                |
| <b>Benzo[b]fluoranthene</b> | 0.000 ± 0.0000 |                                |
| <b>Benzo(k)fluorantene</b>  | 0.000 ± 0.0000 |                                |
| <b>Benzo(a)pyrene</b>       | 0.000 ± 0.0000 |                                |
| <b>Indeno(123cd)pyrene</b>  | 0.000 ± 0.0000 |                                |
| <b>Dibenz(ah)antracene</b>  | 0.000 ± 0.0000 |                                |
| <b>Benzo(ghi)perylene</b>   | 0.000 ± 0.0000 |                                |
| <b>Total PAHs</b>           | 0.081 ± 0.0100 |                                |
| <b>Naphthalene</b>          | 0.054 ± 0.0067 |                                |
| <b>Acenaphthylene</b>       | 0.000 ± 0.0000 |                                |
| <b>Acenaphthene</b>         | 0.000 ± 0.0000 |                                |
| <b>Fluorene</b>             | 0.007 ± 0.0018 |                                |
| <b>Phenanthrene</b>         | 0.037 ± 0.0082 |                                |
| <b>Antracene</b>            | 0.000 ± 0.0011 | Pine wood, 700 °C <sup>4</sup> |
| <b>Fluorantene</b>          | 0.007 ± 0.0026 |                                |
| <b>Pyrene</b>               | 0.005 ± 0.0016 |                                |
| <b>Benz(a)antracene</b>     | 0.000 ± 0.0000 |                                |
| <b>Chrysene</b>             | 0.000 ± 0.0000 |                                |
| <b>Benzo[b]fluoranthene</b> | 0.000 ± 0.0000 |                                |



|                             |                |                                |
|-----------------------------|----------------|--------------------------------|
| <b>Benzo(k)fluorantene</b>  | 0.000 ± 0.0000 |                                |
| <b>Benzo(a)pyrene</b>       | 0.000 ± 0.0000 |                                |
| <b>Indeno(123cd)pyrene</b>  | 0.000 ± 0.0000 |                                |
| <b>Dibenz(ah)anthracene</b> | 0.000 ± 0.0000 |                                |
| <b>Benzo(ghi)perylene</b>   | 0.000 ± 0.0000 |                                |
| <b>Total PAHs</b>           | 0.111 ± 0.0142 |                                |
| <b>Naphthalene</b>          | 0.072 ± 0.0036 |                                |
| <b>Acenaphthylene</b>       | 0.000 ± 0.0000 |                                |
| <b>Acenaphthene</b>         | 0.009 ± 0.0008 |                                |
| <b>Fluorene</b>             | 0.011 ± 0.0030 |                                |
| <b>Phenanthrene</b>         | 0.040 ± 0.0065 |                                |
| <b>Antracene</b>            | 0.000 ± 0.0000 |                                |
| <b>Fluorantene</b>          | 0.003 ± 0.0010 |                                |
| <b>Pyrene</b>               | 0.002 ± 0.0016 |                                |
| <b>Benz(a)anthracene</b>    | 0.000 ± 0.0000 | Pine wood, 800 °C <sup>4</sup> |
| <b>Chrysene</b>             | 0.000 ± 0.0000 |                                |
| <b>Benzo[b]fluoranthene</b> | 0.000 ± 0.0000 |                                |
| <b>Benzo(k)fluorantene</b>  | 0.000 ± 0.0000 |                                |
| <b>Benzo(a)pyrene</b>       | 0.000 ± 0.0000 |                                |
| <b>Indeno(123cd)pyrene</b>  | 0.000 ± 0.0000 |                                |
| <b>Dibenz(ah)anthracene</b> | 0.000 ± 0.0000 |                                |
| <b>Benzo(ghi)perylene</b>   | 0.000 ± 0.0000 |                                |
| <b>Total PAHs</b>           | 0.138 ± 0.0137 |                                |
| <b>Naphthalene</b>          | 0.053 ± 0.0046 |                                |
| <b>Acenaphthylene</b>       | 0.000 ± 0.0000 |                                |
| <b>Acenaphthene</b>         | 0.000 ± 0.0000 |                                |
| <b>Fluorene</b>             | 0.000 ± 0.0000 |                                |
| <b>Phenanthrene</b>         | 0.020 ± 0.0097 |                                |
| <b>Antracene</b>            | 0.000 ± 0.0000 |                                |
| <b>Fluorantene</b>          | 0.001 ± 0.0016 |                                |
| <b>Pyrene</b>               | 0.000 ± 0.0000 | Pine wood, 900 °C <sup>4</sup> |
| <b>Benz(a)anthracene</b>    | 0.000 ± 0.0000 |                                |
| <b>Chrysene</b>             | 0.000 ± 0.0000 |                                |
| <b>Benzo[b]fluoranthene</b> | 0.000 ± 0.0000 |                                |
| <b>Benzo(k)fluorantene</b>  | 0.000 ± 0.0000 |                                |
| <b>Benzo(a)pyrene</b>       | 0.000 ± 0.0000 |                                |
| <b>Indeno(123cd)pyrene</b>  | 0.000 ± 0.0000 |                                |
| <b>Dibenz(ah)anthracene</b> | 0.000 ± 0.0000 |                                |
| <b>Benzo(ghi)perylene</b>   | 0.000 ± 0.0000 |                                |

|                             |                |                                   |
|-----------------------------|----------------|-----------------------------------|
| <b>Total PAHs</b>           | 0.073 ± 0.0127 |                                   |
| <b>Naphthalene</b>          | 0.059 ± 0.0133 |                                   |
| <b>Acenaphthylene</b>       | 0.000 ± 0.0000 |                                   |
| <b>Acenaphthene</b>         | 0.000 ± 0.0000 |                                   |
| <b>Fluorene</b>             | 0.009 ± 0.0028 |                                   |
| <b>Phenanthrene</b>         | 0.034 ± 0.0099 |                                   |
| <b>Antracene</b>            | 0.000 ± 0.0000 |                                   |
| <b>Fluorantene</b>          | 0.004 ± 0.0015 |                                   |
| <b>Pyrene</b>               | 0.004 ± 0.0009 |                                   |
| <b>Benz(a)anthracene</b>    | 0.000 ± 0.0004 | Switch grass, 250 °C <sup>4</sup> |
| <b>Chrysene</b>             | 0.007 ± 0.0043 |                                   |
| <b>Benzo[b]fluoranthene</b> | 0.000 ± 0.0000 |                                   |
| <b>Benzo(k)fluorantene</b>  | 0.000 ± 0.0000 |                                   |
| <b>Benzo(a)pyrene</b>       | 0.000 ± 0.0000 |                                   |
| <b>Indeno(123cd)pyrene</b>  | 0.000 ± 0.0000 |                                   |
| <b>Dibenz(ah)anthracene</b> | 0.000 ± 0.0000 |                                   |
| <b>Benzo(ghi)perylene</b>   | 0.000 ± 0.0000 |                                   |
| <b>Total PAHs</b>           | 0.118 ± 0.0063 |                                   |
| <b>Naphthalene</b>          | 0.100 ± 0.0194 |                                   |
| <b>Acenaphthylene</b>       | 0.000 ± 0.0000 |                                   |
| <b>Acenaphthene</b>         | 0.000 ± 0.0000 |                                   |
| <b>Fluorene</b>             | 0.074 ± 0.0444 |                                   |
| <b>Phenanthrene</b>         | 0.181 ± 0.0948 |                                   |
| <b>Antracene</b>            | 0.022 ± 0.0089 |                                   |
| <b>Fluorantene</b>          | 0.040 ± 0.0276 |                                   |
| <b>Pyrene</b>               | 0.053 ± 0.0367 |                                   |
| <b>Benz(a)anthracene</b>    | 0.018 ± 0.0117 | Switch grass, 350 °C <sup>4</sup> |
| <b>Chrysene</b>             | 0.090 ± 0.0557 |                                   |
| <b>Benzo[b]fluoranthene</b> | 0.003 ± 0.0050 |                                   |
| <b>Benzo(k)fluorantene</b>  | 0.002 ± 0.0036 |                                   |
| <b>Benzo(a)pyrene</b>       | 0.009 ± 0.0053 |                                   |
| <b>Indeno(123cd)pyrene</b>  | 0.001 ± 0.0021 |                                   |
| <b>Dibenz(ah)anthracene</b> | 0.000 ± 0.0000 |                                   |
| <b>Benzo(ghi)perylene</b>   | 0.003 ± 0.0057 |                                   |
| <b>Total PAHs</b>           | 0.597 ± 0.3053 |                                   |
| <b>Naphthalene</b>          | 0.064 ± 0.0130 |                                   |
| <b>Acenaphthylene</b>       | 0.006 ± 0.0058 | Switch grass, 500 °C <sup>4</sup> |
| <b>Acenaphthene</b>         | 0.006 ± 0.0063 |                                   |
| <b>Fluorene</b>             | 0.024 ± 0.0160 |                                   |

|                             |                |                                   |
|-----------------------------|----------------|-----------------------------------|
| <b>Phenanthrene</b>         | 0.060 ± 0.0150 |                                   |
| <b>Antracene</b>            | 0.006 ± 0.0019 |                                   |
| <b>Fluorantene</b>          | 0.014 ± 0.0035 |                                   |
| <b>Pyrene</b>               | 0.013 ± 0.0036 |                                   |
| <b>Benz(a)antracene</b>     | 0.006 ± 0.0018 |                                   |
| <b>Chrysene</b>             | 0.007 ± 0.0023 |                                   |
| <b>Benzo[b]fluoranthene</b> | 0.005 ± 0.0043 |                                   |
| <b>Benzo(k)fluorantene</b>  | 0.002 ± 0.0022 |                                   |
| <b>Benzo(a)pyrene</b>       | 0.005 ± 0.0034 |                                   |
| <b>Indeno(123cd)pyrene</b>  | 0.003 ± 0.0025 |                                   |
| <b>Dibenz(ah)antracene</b>  | 0.000 ± 0.0000 |                                   |
| <b>Benzo(ghi)perylene</b>   | 0.004 ± 0.0007 |                                   |
| <b>Total PAHs</b>           | 0.225 ± 0.0488 |                                   |
| <b>Naphthalene</b>          | 0.090 ± 0.0214 |                                   |
| <b>Acenaphthylene</b>       | 0.021 ± 0.0090 |                                   |
| <b>Acenaphthene</b>         | 0.005 ± 0.0053 |                                   |
| <b>Fluorene</b>             | 0.025 ± 0.0063 |                                   |
| <b>Phenanthrene</b>         | 0.067 ± 0.0160 |                                   |
| <b>Antracene</b>            | 0.008 ± 0.0028 |                                   |
| <b>Fluorantene</b>          | 0.022 ± 0.0053 |                                   |
| <b>Pyrene</b>               | 0.019 ± 0.0056 |                                   |
| <b>Benz(a)antracene</b>     | 0.005 ± 0.0021 | Switch grass, 600 °C <sup>4</sup> |
| <b>Chrysene</b>             | 0.005 ± 0.0021 |                                   |
| <b>Benzo[b]fluoranthene</b> | 0.004 ± 0.0025 |                                   |
| <b>Benzo(k)fluorantene</b>  | 0.003 ± 0.0021 |                                   |
| <b>Benzo(a)pyrene</b>       | 0.004 ± 0.0036 |                                   |
| <b>Indeno(123cd)pyrene</b>  | 0.001 ± 0.0012 |                                   |
| <b>Dibenz(ah)antracene</b>  | 0.000 ± 0.0000 |                                   |
| <b>Benzo(ghi)perylene</b>   | 0.001 ± 0.0010 |                                   |
| <b>Total PAHs</b>           | 0.279 ± 0.0577 |                                   |
| <b>Naphthalene</b>          | 0.055 ± 0.01   |                                   |
| <b>Acenaphthylene</b>       | 0.013 ± 0.00   |                                   |
| <b>Acenaphthene</b>         | 0.002 ± 0.00   |                                   |
| <b>Fluorene</b>             | 0.009 ± 0.00   |                                   |
| <b>Phenanthrene</b>         | 0.040 ± 0.00   | Switch grass, 700 °C <sup>4</sup> |
| <b>Antracene</b>            | 0.004 ± 0.00   |                                   |
| <b>Fluorantene</b>          | 0.017 ± 0.00   |                                   |
| <b>Pyrene</b>               | 0.013 ± 0.00   |                                   |
| <b>Benz(a)antracene</b>     | 0.003 ± 0.00   |                                   |

|                             |                |                                               |
|-----------------------------|----------------|-----------------------------------------------|
| <b>Chrysene</b>             | 0.003 ± 0.00   |                                               |
| <b>Benzo[b]fluoranthene</b> | 0.000 ± 0.00   |                                               |
| <b>Benzo(k)fluorantene</b>  | 0.000 ± 0.00   |                                               |
| <b>Benzo(a)pyrene</b>       | 0.000 ± 0.00   |                                               |
| <b>Indeno(123cd)pyrene</b>  | 0.000 ± 0.00   |                                               |
| <b>Dibenz(ah)anthracene</b> | 0.000 ± 0.00   |                                               |
| <b>Benzo(ghi)perylene</b>   | 0.000 ± 0.00   |                                               |
| <b>Total PAHs</b>           | 0.158 ± 0.01   |                                               |
| <b>Naphthalene</b>          | 0.525 ± 0.1919 |                                               |
| <b>Acenaphthylene</b>       | 0.005 ± 0.0045 |                                               |
| <b>Acenaphthene</b>         | 0.004 ± 0.0035 |                                               |
| <b>Fluorene</b>             | 0.038 ± 0.0074 |                                               |
| <b>Phenanthrene</b>         | 0.592 ± 0.0838 |                                               |
| <b>Antracene</b>            | 0.085 ± 0.0086 |                                               |
| <b>Fluorantene</b>          | 0.101 ± 0.0113 |                                               |
| <b>Pyrene</b>               | 0.110 ± 0.0140 |                                               |
| <b>Benz(a)anthracene</b>    | 0.057 ± 0.0060 | Zambia charcoal dust, 350-450 °C <sup>4</sup> |
| <b>Chrysene</b>             | 0.078 ± 0.0114 |                                               |
| <b>Benzo[b]fluoranthene</b> | 0.029 ± 0.0067 |                                               |
| <b>Benzo(k)fluorantene</b>  | 0.015 ± 0.0029 |                                               |
| <b>Benzo(a)pyrene</b>       | 0.024 ± 0.0030 |                                               |
| <b>Indeno(123cd)pyrene</b>  | 0.013 ± 0.0003 |                                               |
| <b>Dibenz(ah)anthracene</b> | 0.005 ± 0.0003 |                                               |
| <b>Benzo(ghi)perylene</b>   | 0.018 ± 0.0015 |                                               |
| <b>Total PAHs</b>           | 1.701 ± 0.2386 |                                               |
| <b>Naphthalene</b>          | 0.690 ± 0.0296 |                                               |
| <b>Acenaphthylene</b>       | 0.004 ± 0.0063 |                                               |
| <b>Acenaphthene</b>         | 0.028 ± 0.0076 |                                               |
| <b>Fluorene</b>             | 0.160 ± 0.0184 |                                               |
| <b>Phenanthrene</b>         | 0.450 ± 0.0396 |                                               |
| <b>Antracene</b>            | 0.089 ± 0.0098 |                                               |
| <b>Fluorantene</b>          | 0.167 ± 0.0145 | Zambia stover, 350-450 °C <sup>4</sup>        |
| <b>Pyrene</b>               | 0.155 ± 0.0109 |                                               |
| <b>Benz(a)anthracene</b>    | 0.056 ± 0.0065 |                                               |
| <b>Chrysene</b>             | 0.086 ± 0.0069 |                                               |
| <b>Benzo[b]fluoranthene</b> | 0.024 ± 0.0046 |                                               |
| <b>Benzo(k)fluorantene</b>  | 0.017 ± 0.0013 |                                               |
| <b>Benzo(a)pyrene</b>       | 0.025 ± 0.0014 |                                               |
| <b>Indeno(123cd)pyrene</b>  | 0.014 ± 0.0025 |                                               |

|                             |                |                                                           |
|-----------------------------|----------------|-----------------------------------------------------------|
| <b>Dibenz(ah)anthracene</b> | 0.001 ± 0.0021 |                                                           |
| <b>Benzo(ghi)perylene</b>   | 0.014 ± 0.0018 |                                                           |
| <b>Total PAHs</b>           | 1.980 ± 0.1435 |                                                           |
| <b>Naphthalene</b>          | 0.560 ± 0.4078 |                                                           |
| <b>Acenaphthylene</b>       | 0.006 ± 0.0054 |                                                           |
| <b>Acenaphthene</b>         | 0.000 ± 0.0000 |                                                           |
| <b>Fluorene</b>             | 0.034 ± 0.0040 |                                                           |
| <b>Phenanthrene</b>         | 0.673 ± 0.0413 |                                                           |
| <b>Antracene</b>            | 0.086 ± 0.0040 |                                                           |
| <b>Fluorantene</b>          | 0.108 ± 0.0040 |                                                           |
| <b>Pyrene</b>               | 0.126 ± 0.0061 |                                                           |
| <b>Benz(a)anthracene</b>    | 0.042 ± 0.0023 | Indonesia mixed forest , 350-450 °C <sup>4</sup>          |
| <b>Chrysene</b>             | 0.071 ± 0.0039 |                                                           |
| <b>Benzo[b]fluoranthene</b> | 0.027 ± 0.0064 |                                                           |
| <b>Benzo(k)fluorantene</b>  | 0.017 ± 0.0026 |                                                           |
| <b>Benzo(a)pyrene</b>       | 0.027 ± 0.0041 |                                                           |
| <b>Indeno(123cd)pyrene</b>  | 0.018 ± 0.0005 |                                                           |
| <b>Dibenz(ah)anthracene</b> | 0.005 ± 0.0011 |                                                           |
| <b>Benzo(ghi)perylene</b>   | 0.028 ± 0.0016 |                                                           |
| <b>Total PAHs</b>           | 1.829 ± 0.3529 |                                                           |
| <b>Naphthalene</b>          | 0.246 ± 0.0026 |                                                           |
| <b>Acenaphthylene</b>       | 0.000 ± 0.0000 |                                                           |
| <b>Acenaphthene</b>         | 0.000 ± 0.0000 |                                                           |
| <b>Fluorene</b>             | 0.029 ± 0.0023 |                                                           |
| <b>Phenanthrene</b>         | 0.102 ± 0.0020 |                                                           |
| <b>Antracene</b>            | 0.016 ± 0.0038 |                                                           |
| <b>Fluorantene</b>          | 0.027 ± 0.0012 |                                                           |
| <b>Pyrene</b>               | 0.028 ± 0.0022 |                                                           |
| <b>Benz(a)anthracene</b>    | 0.015 ± 0.0003 | Indonesia rice husk char , 350-450 °C <sup>4</sup>        |
| <b>Chrysene</b>             | 0.022 ± 0.0013 |                                                           |
| <b>Benzo[b]fluoranthene</b> | 0.003 ± 0.0033 |                                                           |
| <b>Benzo(k)fluorantene</b>  | 0.003 ± 0.0046 |                                                           |
| <b>Benzo(a)pyrene</b>       | 0.010 ± 0.0005 |                                                           |
| <b>Indeno(123cd)pyrene</b>  | 0.006 ± 0.0005 |                                                           |
| <b>Dibenz(ah)anthracene</b> | 0.001 ± 0.0015 |                                                           |
| <b>Benzo(ghi)perylene</b>   | 0.006 ± 0.0009 |                                                           |
| <b>Total PAHs</b>           | 0.514 ± 0.0148 |                                                           |
| <b>Naphthalene</b>          | 0.285 ± 0.0826 | Kenya maize residues as corncoobs, open fire <sup>4</sup> |
| <b>Acenaphthylene</b>       | 0.000 ± 0.0000 |                                                           |

|                             |                |                                                            |
|-----------------------------|----------------|------------------------------------------------------------|
| <b>Acenaphthene</b>         | 0.010 ± 0.0020 |                                                            |
| <b>Fluorene</b>             | 0.109 ± 0.0168 |                                                            |
| <b>Phenanthrene</b>         | 0.311 ± 0.0442 |                                                            |
| <b>Antracene</b>            | 0.067 ± 0.0083 |                                                            |
| <b>Fluorantene</b>          | 0.117 ± 0.0192 |                                                            |
| <b>Pyrene</b>               | 0.118 ± 0.0190 |                                                            |
| <b>Benz(a)antracene</b>     | 0.059 ± 0.0085 |                                                            |
| <b>Chrysene</b>             | 0.070 ± 0.0112 |                                                            |
| <b>Benzo[b]fluoranthene</b> | 0.027 ± 0.0119 |                                                            |
| <b>Benzo(k)fluorantene</b>  | 0.019 ± 0.0011 |                                                            |
| <b>Benzo(a)pyrene</b>       | 0.041 ± 0.0051 |                                                            |
| <b>Indeno(123cd)pyrene</b>  | 0.023 ± 0.0039 |                                                            |
| <b>Dibenz(ah)antracene</b>  | 0.001 ± 0.0023 |                                                            |
| <b>Benzo(ghi)perylene</b>   | 0.017 ± 0.0018 |                                                            |
| <b>Total PAHs</b>           | 1.273 ± 0.2293 |                                                            |
| <b>Naphthalene</b>          | 0.404 ± 0.1205 |                                                            |
| <b>Acenaphtylene</b>        | 0.005 ± 0.0048 |                                                            |
| <b>Acenaphthene</b>         | 0.023 ± 0.0125 |                                                            |
| <b>Fluorene</b>             | 0.111 ± 0.0242 |                                                            |
| <b>Phenanthrene</b>         | 0.665 ± 0.1554 |                                                            |
| <b>Antracene</b>            | 0.130 ± 0.0335 |                                                            |
| <b>Fluorantene</b>          | 0.352 ± 0.0741 |                                                            |
| <b>Pyrene</b>               | 0.411 ± 0.0869 |                                                            |
| <b>Benz(a)antracene</b>     | 0.279 ± 0.0590 | Kenya maize residues as cornstover, open fire <sup>4</sup> |
| <b>Chrysene</b>             | 0.226 ± 0.2804 |                                                            |
| <b>Benzo[b]fluoranthene</b> | 0.130 ± 0.0159 |                                                            |
| <b>Benzo(k)fluorantene</b>  | 0.112 ± 0.0245 |                                                            |
| <b>Benzo(a)pyrene</b>       | 0.197 ± 0.0396 |                                                            |
| <b>Indeno(123cd)pyrene</b>  | 0.120 ± 0.0263 |                                                            |
| <b>Dibenz(ah)antracene</b>  | 0.019 ± 0.0068 |                                                            |
| <b>Benzo(ghi)perylene</b>   | 0.089 ± 0.0066 |                                                            |
| <b>Total PAHs</b>           | 3.273 ± 0.9170 |                                                            |
| <b>Naphthalene</b>          | 0.080 ± 0.0082 |                                                            |
| <b>Acenaphtylene</b>        | 0.000 ± 0.0000 |                                                            |
| <b>Acenaphthene</b>         | 0.000 ± 0.0000 |                                                            |
| <b>Fluorene</b>             | 0.013 ± 0.0031 | Kenya woody biomass as sawdust, open fire <sup>4</sup>     |
| <b>Phenanthrene</b>         | 0.030 ± 0.0036 |                                                            |
| <b>Antracene</b>            | 0.003 ± 0.0028 |                                                            |
| <b>Fluorantene</b>          | 0.008 ± 0.0009 |                                                            |

|                             |                |                                                    |
|-----------------------------|----------------|----------------------------------------------------|
| <b>Pyrene</b>               | 0.014 ± 0.0019 |                                                    |
| <b>Benz(a)anthracene</b>    | 0.003 ± 0.0004 |                                                    |
| <b>Chrysene</b>             | 0.003 ± 0.0005 |                                                    |
| <b>Benzo[b]fluoranthene</b> | 0.000 ± 0.0000 |                                                    |
| <b>Benzo(k)fluorantene</b>  | 0.000 ± 0.0000 |                                                    |
| <b>Benzo(a)pyrene</b>       | 0.000 ± 0.0000 |                                                    |
| <b>Indeno(123cd)pyrene</b>  | 0.000 ± 0.0000 |                                                    |
| <b>Dibenz(ah)anthracene</b> | 0.000 ± 0.0000 |                                                    |
| <b>Benzo(ghi)perylene</b>   | 0.000 ± 0.0000 |                                                    |
| <b>Total PAHs</b>           | 0.155 ± 0.0152 |                                                    |
| <b>Naphthalene</b>          | 0.102 ± 0.0039 |                                                    |
| <b>Acenaphthylene</b>       | 0.000 ± 0.0000 |                                                    |
| <b>Acenaphthene</b>         | 0.000 ± 0.0000 |                                                    |
| <b>Fluorene</b>             | 0.015 ± 0.0016 |                                                    |
| <b>Phenanthrene</b>         | 0.059 ± 0.0493 |                                                    |
| <b>Antracene</b>            | 0.003 ± 0.0023 |                                                    |
| <b>Fluorantene</b>          | 0.014 ± 0.0011 |                                                    |
| <b>Pyrene</b>               | 0.013 ± 0.0012 |                                                    |
| <b>Benz(a)anthracene</b>    | 0.001 ± 0.0002 | Empty Fruit Bunch (EFB) VESTO <sup>4</sup>         |
| <b>Chrysene</b>             | 0.003 ± 0.0006 |                                                    |
| <b>Benzo[b]fluoranthene</b> | 0.001 ± 0.0006 |                                                    |
| <b>Benzo(k)fluorantene</b>  | 0.000 ± 0.0003 |                                                    |
| <b>Benzo(a)pyrene</b>       | 0.000 ± 0.0002 |                                                    |
| <b>Indeno(123cd)pyrene</b>  | 0.000 ± 0.0001 |                                                    |
| <b>Dibenz(ah)anthracene</b> | 0.000 ± 0.0000 |                                                    |
| <b>Benzo(ghi)perylene</b>   | 0.000 ± 0.0001 |                                                    |
| <b>Total PAHs</b>           | 0.211 ± 0.0610 |                                                    |
| <b>Naphthalene</b>          | 0.036 ± 0.0035 |                                                    |
| <b>Acenaphthylene</b>       | 0.000 ± 0.0000 |                                                    |
| <b>Acenaphthene</b>         | 0.000 ± 0.0000 |                                                    |
| <b>Fluorene</b>             | 0.021 ± 0.0087 |                                                    |
| <b>Phenanthrene</b>         | 0.066 ± 0.0053 |                                                    |
| <b>Antracene</b>            | 0.001 ± 0.0015 | EFB Malaysian Traditional stove (NTS) <sup>4</sup> |
| <b>Fluorantene</b>          | 0.011 ± 0.0029 |                                                    |
| <b>Pyrene</b>               | 0.012 ± 0.0019 |                                                    |
| <b>Benz(a)anthracene</b>    | 0.000 ± 0.0001 |                                                    |
| <b>Chrysene</b>             | 0.001 ± 0.0003 |                                                    |
| <b>Benzo[b]fluoranthene</b> | 0.000 ± 0.0000 |                                                    |
| <b>Benzo(k)fluorantene</b>  | 0.000 ± 0.0000 |                                                    |

|                             |                |                                                        |
|-----------------------------|----------------|--------------------------------------------------------|
| <b>Benzo(a)pyrene</b>       | 0.000 ± 0.0000 |                                                        |
| <b>Indeno(123cd)pyrene</b>  | 0.000 ± 0.0000 |                                                        |
| <b>Dibenz(ah)anthracene</b> | 0.000 ± 0.0000 |                                                        |
| <b>Benzo(ghi)perylene</b>   | 0.000 ± 0.0000 |                                                        |
| <b>Total PAHs</b>           | 0.148 ± 0.0191 |                                                        |
| <b>Naphthalene</b>          | 0.117 ± 0.0173 |                                                        |
| <b>Acenaphthylene</b>       | 0.000 ± 0.0000 |                                                        |
| <b>Acenaphthene</b>         | 0.000 ± 0.0000 |                                                        |
| <b>Fluorene</b>             | 0.010 ± 0.0028 |                                                        |
| <b>Phenanthrene</b>         | 0.162 ± 0.0680 |                                                        |
| <b>Antracene</b>            | 0.000 ± 0.0000 |                                                        |
| <b>Fluorantene</b>          | 0.027 ± 0.0021 |                                                        |
| <b>Pyrene</b>               | 0.025 ± 0.0028 |                                                        |
| <b>Benz(a)anthracene</b>    | 0.001 ± 0.0001 | EFB Top lit up draft (TLUD), 650 – 700 °C <sup>4</sup> |
| <b>Chrysene</b>             | 0.002 ± 0.0004 |                                                        |
| <b>Benzo[b]fluoranthene</b> | 0.000 ± 0.0000 |                                                        |
| <b>Benzo(k)fluorantene</b>  | 0.000 ± 0.0000 |                                                        |
| <b>Benzo(a)pyrene</b>       | 0.000 ± 0.0000 |                                                        |
| <b>Indeno(123cd)pyrene</b>  | 0.000 ± 0.0000 |                                                        |
| <b>Dibenz(ah)anthracene</b> | 0.000 ± 0.0000 |                                                        |
| <b>Benzo(ghi)perylene</b>   | 0.000 ± 0.0003 |                                                        |
| <b>Total PAHs</b>           | 0.344 ± 0.0932 |                                                        |
| <b>Naphthalene</b>          | 0.046 ± 0.0050 |                                                        |
| <b>Acenaphthylene</b>       | 0.000 ± 0.0000 |                                                        |
| <b>Acenaphthene</b>         | 0.000 ± 0.0000 |                                                        |
| <b>Fluorene</b>             | 0.003 ± 0.0051 |                                                        |
| <b>Phenanthrene</b>         | 0.066 ± 0.0053 |                                                        |
| <b>Antracene</b>            | 0.002 ± 0.0014 |                                                        |
| <b>Fluorantene</b>          | 0.016 ± 0.0031 |                                                        |
| <b>Pyrene</b>               | 0.019 ± 0.0028 |                                                        |
| <b>Benz(a)anthracene</b>    | 0.001 ± 0.0000 | Coconut shell (CCS) TLUD <sup>4</sup>                  |
| <b>Chrysene</b>             | 0.002 ± 0.0002 |                                                        |
| <b>Benzo[b]fluoranthene</b> | 0.001 ± 0.0006 |                                                        |
| <b>Benzo(k)fluorantene</b>  | 0.000 ± 0.0003 |                                                        |
| <b>Benzo(a)pyrene</b>       | 0.001 ± 0.0009 |                                                        |
| <b>Indeno(123cd)pyrene</b>  | 0.000 ± 0.0003 |                                                        |
| <b>Dibenz(ah)anthracene</b> | 0.000 ± 0.0000 |                                                        |
| <b>Benzo(ghi)perylene</b>   | 0.001 ± 0.0001 |                                                        |
| <b>Total PAHs</b>           | 0.158 ± 0.0117 |                                                        |



|                                                        |                                       |                               |                    |
|--------------------------------------------------------|---------------------------------------|-------------------------------|--------------------|
| <b>Naphthalene</b>                                     | 0.356 ± 0.0172                        |                               |                    |
| <b>Acenaphthylene</b>                                  | 0.000 ± 0.0000                        |                               |                    |
| <b>Acenaphthene</b>                                    | 0.000 ± 0.0000                        |                               |                    |
| <b>Fluorene</b>                                        | 0.007 ± 0.0004                        |                               |                    |
| <b>Phenanthrene</b>                                    | 0.124 ± 0.0089                        |                               |                    |
| <b>Antracene</b>                                       | 0.008 ± 0.0011                        |                               |                    |
| <b>Fluorantene</b>                                     | 0.018 ± 0.0017                        |                               |                    |
| <b>Pyrene</b>                                          | 0.014 ± 0.0010                        |                               |                    |
| <b>Benz(a)anthracene</b>                               | 0.003 ± 0.0001                        | CCS 3 stove <sup>4</sup>      |                    |
| <b>Chrysene</b>                                        | 0.005 ± 0.0003                        |                               |                    |
| <b>Benzo[b]fluoranthene</b>                            | 0.002 ± 0.0006                        |                               |                    |
| <b>Benzo(k)fluorantene</b>                             | 0.001 ± 0.0003                        |                               |                    |
| <b>Benzo(a)pyrene</b>                                  | 0.001 ± 0.0001                        |                               |                    |
| <b>Indeno(123cd)pyrene</b>                             | 0.002 ± 0.0003                        |                               |                    |
| <b>Dibenz(ah)anthracene</b>                            | 0.000 ± 0.0000                        |                               |                    |
| <b>Benzo(ghi)perylene</b>                              | 0.002 ± 0.0002                        |                               |                    |
| <b>Total PAHs</b>                                      | 0.544 ± 0.0223                        |                               |                    |
| <b>Total tetra-octa chlorinated dioxin<sup>4</sup></b> | 9.2×10 <sup>-5</sup>                  | Food waste, 400 °C            |                    |
|                                                        | 8.4×10 <sup>-5</sup>                  | Food waste, 600 °C            |                    |
|                                                        | 8.55×10 <sup>-5</sup>                 | Digested dairy manure, 600 °C |                    |
|                                                        | 9.15×10 <sup>-5</sup>                 | Pine wood, 900 °C             |                    |
|                                                        | 8.6×10 <sup>-5</sup>                  | Lodge pole pine, 700-750 °C   |                    |
| <b>Total 2,3,7,8-substitutes dioxin<sup>4</sup></b>    | 1.22×10 <sup>-5</sup>                 | Food waste, 400 °C            |                    |
|                                                        | 7.5×10 <sup>-6</sup>                  | Food waste, 600 °C            |                    |
|                                                        | 8.0×10 <sup>-6</sup>                  | Digested dairy manure, 600 °C |                    |
|                                                        | 1.07×10 <sup>-5</sup>                 | Pine wood, 900 °C             |                    |
|                                                        | 1.05×10 <sup>-5</sup>                 | Lodge pole pine, 700-750 °C   |                    |
|                                                        | 1.33×10 <sup>-5</sup>                 | Food waste, 300 °C            |                    |
|                                                        | 3.9×10 <sup>-7</sup>                  | Food waste, 500 °C            |                    |
|                                                        | 1.5×10 <sup>-6</sup>                  | Oak, 650 °C                   |                    |
|                                                        | 2.4×10 <sup>-6</sup>                  | Grass, 650 °C                 |                    |
|                                                        | 5.0×10 <sup>-7</sup>                  | Pine wood, 800 °C             |                    |
|                                                        | 8.0×10 <sup>-7</sup>                  | Switch grass, 800 °C          |                    |
|                                                        | 2.2×10 <sup>-6</sup>                  | Switch grass, 900             |                    |
|                                                        | 6.0×10 <sup>-7</sup>                  | Paper mill waste, 600 °C      |                    |
|                                                        | <b>Total toxic dioxin<sup>4</sup></b> | 1.5×10 <sup>-7</sup>          | Food waste, 400 °C |
|                                                        |                                       | 1.6×10 <sup>-7</sup>          | Food waste, 600 °C |
| 1.3×10 <sup>-7</sup>                                   |                                       | Digested dairy manure, 600 °C |                    |
| 1.5×10 <sup>-7</sup>                                   |                                       | Pine wood, 900 °C             |                    |
| 1.8×10 <sup>-7</sup>                                   |                                       | Lodge pole pine, 700-750 °C   |                    |
| 1.2×10 <sup>-6</sup>                                   |                                       | Food waste, 300 °C            |                    |
| 8.0×10 <sup>-9</sup>                                   |                                       | Food waste, 500 °C            |                    |
| 2.0×10 <sup>-8</sup>                                   | Oak, 650 °C                           |                               |                    |

|                               |                      |                                                          |
|-------------------------------|----------------------|----------------------------------------------------------|
|                               | $2.0 \times 10^{-8}$ | Grass, 650 °C                                            |
|                               | $5.0 \times 10^{-9}$ | Pine wood, 800 °C                                        |
|                               | $8.0 \times 10^{-9}$ | Switch grass, 800 °C                                     |
|                               | $2.2 \times 10^{-7}$ | Switch grass, 900                                        |
|                               | $6.0 \times 10^{-8}$ | Paper mill waste, 600 °C                                 |
| <b>naphthalene</b>            | $5.941 \pm 0.125$    |                                                          |
| <b>acenaphthylene</b>         | $0.038 \pm 0.012$    |                                                          |
| <b>acenaphthene</b>           | $0.109 \pm 0.010$    |                                                          |
| <b>fluorene</b>               | $0.611 \pm 0.026$    |                                                          |
| <b>phenanthrene</b>           | $1.760 \pm 0.080$    |                                                          |
| <b>anthracene</b>             | $0.419 \pm 0.012$    |                                                          |
| <b>fluoranthene</b>           | $0.217 \pm 0.022$    |                                                          |
| <b>pyrene</b>                 | $0.252 \pm 0.027$    |                                                          |
| <b>benzo[a]anthracene</b>     | $0.141 \pm 0.016$    | Grapevine wood, 1 year old, 350-750 °C <sup>5</sup>      |
| <b>chrysene</b>               | $0.151 \pm 0.025$    |                                                          |
| <b>benzo[b]fluoranthene</b>   | $0.022 \pm 0.002$    |                                                          |
| <b>benzo[k]fluoranthene</b>   | $0.035 \pm 0.004$    |                                                          |
| <b>benzo[a]pyrene</b>         | $0.061 \pm 0.005$    |                                                          |
| <b>indeno[1,2,3-cd]pyrene</b> | $0.037 \pm 0.000$    |                                                          |
| <b>dibenz[a,h]anthracene</b>  | $0.001 \pm 0.0003$   |                                                          |
| <b>benzo[ghi]perylene</b>     | $0.021 \pm 0.001$    |                                                          |
| <b>∑16 EPA PAH</b>            | $9.818 \pm 0.116$    |                                                          |
| <b>naphthalene</b>            | $26.089 \pm 2.779$   |                                                          |
| <b>acenaphthylene</b>         | $5.495 \pm 0.671$    |                                                          |
| <b>acenaphthene</b>           | $0.498 \pm 0.457$    |                                                          |
| <b>fluorene</b>               | $0.256 \pm 0.330$    |                                                          |
| <b>phenanthrene</b>           | $9.509 \pm 0.765$    |                                                          |
| <b>anthracene</b>             | $1.772 \pm 0.245$    |                                                          |
| <b>fluoranthene</b>           | $6.628 \pm 0.808$    |                                                          |
| <b>pyrene</b>                 | $5.869 \pm 0.577$    |                                                          |
| <b>benzo[a]anthracene</b>     | $0.940 \pm 0.161$    | Miscanthus, 350-750 °C <sup>5</sup>                      |
| <b>chrysene</b>               | $1.062 \pm 0.184$    |                                                          |
| <b>benzo[b]fluoranthene</b>   | $0.856 \pm 0.335$    |                                                          |
| <b>benzo[k]fluoranthene</b>   | $0.456 \pm 0.243$    |                                                          |
| <b>benzo[a]pyrene</b>         | $1.432 \pm 0.649$    |                                                          |
| <b>indeno[1,2,3-cd]pyrene</b> | $0.690 \pm 0.455$    |                                                          |
| <b>dibenz[a,h]anthracene</b>  | $0.051 \pm 0.036$    |                                                          |
| <b>benzo[ghi]perylene</b>     | $1.128 \pm 0.501$    |                                                          |
| <b>∑16 EPA PAH</b>            | $62.732 \pm 5.938$   |                                                          |
| <b>naphthalene</b>            | $181.160 \pm 29.134$ | Sieved coniferous wood residues, 350-750 °C <sup>5</sup> |

|                                    |                  |                                                                      |
|------------------------------------|------------------|----------------------------------------------------------------------|
| <b>acenaphthylene</b>              | 38.730 ± 1.046   |                                                                      |
| <b>acenaphthene</b>                | 1.699 ± 0.766    |                                                                      |
| <b>fluorene</b>                    | 0.987 ± 0.761    |                                                                      |
| <b>phenanthrene</b>                | 48.836 ± 1.689   |                                                                      |
| <b>anthracene</b>                  | 9.774 ± 0.431    |                                                                      |
| <b>fluoranthene</b>                | 31.527 ± 0.872   |                                                                      |
| <b>pyrene</b>                      | 22.458 ± 0.635   |                                                                      |
| <b>benzo[a]anthracene</b>          | 4.416 ± 0.213    |                                                                      |
| <b>chrysene</b>                    | 4.811 ± 0.362    |                                                                      |
| <b>benzo[b]fluoranthene</b>        | 3.600 ± 0.244    |                                                                      |
| <b>benzo[k]fluoranthene</b>        | 2.105 ± 0.203    |                                                                      |
| <b>benzo[a]pyrene</b>              | 4.711 ± 0.498    |                                                                      |
| <b>indeno[1,2,3-cd]pyrene</b>      | 3.152 ± 0.211    |                                                                      |
| <b>dibenz[a,h]anthracene</b>       | 0.238 ± 0.027    |                                                                      |
| <b>benzo[ghi]perylene</b>          | 2.821 ± 0.108    |                                                                      |
| <b>∑16 EPA PAH</b>                 | 355.295 ± 30.902 |                                                                      |
| <b>naphthalene</b>                 | 5.143 ± 0.249    |                                                                      |
| <b>acenaphthylene</b>              | 0.367 ± 0.158    |                                                                      |
| <b>acenaphthene</b>                | 0.189 ± 0.159    |                                                                      |
| <b>fluorene</b>                    | 0.089 ± 0.010    |                                                                      |
| <b>phenanthrene</b>                | 1.605 ± 0.083    |                                                                      |
| <b>anthracene</b>                  | 0.330 ± 0.017    |                                                                      |
| <b>fluoranthene</b>                | 0.433 ± 0.025    |                                                                      |
| <b>pyrene</b>                      | 0.355 ± 0.022    |                                                                      |
| <b>benzo[a]anthracene</b>          | 0.134 ± 0.025    | Sieved deciduous and coniferous residues,<br>350-750 °C <sup>5</sup> |
| <b>chrysene</b>                    | 0.169 ± 0.031    |                                                                      |
| <b>benzo[b]fluoranthene</b>        | 0.075 ± 0.042    |                                                                      |
| <b>benzo[k]fluoranthene</b>        | 0.053 ± 0.051    |                                                                      |
| <b>benzo[a]pyrene</b>              | 0.064 ± 0.029    |                                                                      |
| <b>indeno[1,2,3-cd]pyrene</b>      | 0.042 ± 0.031    |                                                                      |
| <b>dibenz[a,h]anthracene</b>       | 0.002 ± 0.003    |                                                                      |
| <b>benzo[ghi]perylene</b>          | 0.044 ± 0.026    |                                                                      |
| <b>∑16 EPA PAH</b>                 | 9.113 ± 0.454    |                                                                      |
| <b>phenanthrene</b>                | 0.017            |                                                                      |
| <b>anthracene</b>                  | 0.004            |                                                                      |
| <b>3-methylphenanthrene</b>        | 0.002            | Grass, 100 °C <sup>6</sup>                                           |
| <b>2-methylphenanthrene</b>        | 0.003            |                                                                      |
| <b>2-methylanthracene</b>          | n.d.             |                                                                      |
| <b>4- and 9-methylphenanthrene</b> | 0.001            |                                                                      |

|                                                               |       |                            |
|---------------------------------------------------------------|-------|----------------------------|
| <b>1-methylphenanthrene</b>                                   | 0.001 |                            |
| <b>1,7-dimethylphenanthrene</b>                               | n.d.  |                            |
| <b>fluoranthene</b>                                           | 0.003 |                            |
| <b>pyrene</b>                                                 | 0.003 |                            |
| <b>retene</b>                                                 | 0.002 |                            |
| <b>benz[a]anthracene</b>                                      | 0.001 |                            |
| <b>chrysene</b>                                               | 0.010 |                            |
| <b>benzofluoranthenes</b>                                     | 0.002 |                            |
| <b>benzo[e]pyrene</b>                                         | 0.002 |                            |
| <b>benzo[a]pyrene</b>                                         | n.d.  |                            |
| <b>indenopyrene</b>                                           | n.d.  |                            |
| <b>benzo[g,h,i]perylene</b>                                   | n.d.  |                            |
| <b>∑PAHs</b>                                                  | 0.050 |                            |
| <b>Sum of 'pyrolytic' PAHs without methylated derivatives</b> | 0.021 |                            |
| <b>Sum of phenanthrene and its methylated derivatives</b>     | 0.025 |                            |
| <b>Sum of dimethylated phenanthrenes</b>                      | n.d.  |                            |
| <b>Sum of trimethylated phenanthrenes</b>                     | n.d.  |                            |
| <b>phenanthrene</b>                                           | 0.023 |                            |
| <b>anthracene</b>                                             | 0.002 |                            |
| <b>3-methylphenanthrene</b>                                   | 0.002 |                            |
| <b>2-methylphenanthrene</b>                                   | 0.002 |                            |
| <b>2-methylanthracene</b>                                     | n.d.  |                            |
| <b>4- and 9-methylphenanthrene</b>                            | 0.001 |                            |
| <b>1-methylphenanthrene</b>                                   | 0.001 |                            |
| <b>1,7-dimethylphenanthrene</b>                               | n.d.  |                            |
| <b>fluoranthene</b>                                           | 0.005 |                            |
| <b>pyrene</b>                                                 | 0.006 | Grass, 200 °C <sup>6</sup> |
| <b>retene</b>                                                 | 0.003 |                            |
| <b>benz[a]anthracene</b>                                      | 0.002 |                            |
| <b>chrysene</b>                                               | 0.401 |                            |
| <b>benzofluoranthenes</b>                                     | n.d.  |                            |
| <b>benzo[e]pyrene</b>                                         | 0.001 |                            |
| <b>benzo[a]pyrene</b>                                         | 0.002 |                            |
| <b>indenopyrene</b>                                           | n.d.  |                            |
| <b>benzo[g,h,i]perylene</b>                                   | n.d.  |                            |
| <b>∑PAHs</b>                                                  | 0.452 |                            |
| <b>Sum of 'pyrolytic' PAHs without</b>                        | 0.416 |                            |

|                                                               |        |                            |
|---------------------------------------------------------------|--------|----------------------------|
| <b>methylated derivatives</b>                                 |        |                            |
| <b>Sum of phenanthrene and its methylated derivatives</b>     | 0.033  |                            |
| <b>Sum of dimethylated phenanthrenes</b>                      | n.d.   |                            |
| <b>Sum of trimethylated phenanthrenes</b>                     | n.d.   |                            |
| <b>phenanthrene</b>                                           | 0.048  |                            |
| <b>anthracene</b>                                             | 0.005  |                            |
| <b>3-methylphenanthrene</b>                                   | 0.004  |                            |
| <b>2-methylphenanthrene</b>                                   | 0.01   |                            |
| <b>2-methylanthracene</b>                                     | n.d.   |                            |
| <b>4- and 9-methylphenanthrene</b>                            | 0.006  |                            |
| <b>1-methylphenanthrene</b>                                   | 0.006  |                            |
| <b>1,7-dimethylphenanthrene</b>                               | 0.0041 |                            |
| <b>fluoranthene</b>                                           | 0.072  |                            |
| <b>pyrene</b>                                                 | 0.242  |                            |
| <b>retene</b>                                                 | 0.048  |                            |
| <b>benz[a]anthracene</b>                                      | 0.028  |                            |
| <b>chrysene</b>                                               | 0.216  | Grass, 300 °C <sup>6</sup> |
| <b>benzofluoranthenes</b>                                     | 0.005  |                            |
| <b>benzo[e]pyrene</b>                                         | 0.006  |                            |
| <b>benzo[a]pyrene</b>                                         | n.d.   |                            |
| <b>indenopyrene</b>                                           | n.d.   |                            |
| <b>benzo[g,h,i]perylene</b>                                   | 0.003  |                            |
| <b>ΣPAHs</b>                                                  | 0.916  |                            |
| <b>Sum of 'pyrolytic' PAHs without methylated derivatives</b> | 0.572  |                            |
| <b>Sum of phenanthrene and its methylated derivatives</b>     | 0.339  |                            |
| <b>Sum of dimethylated phenanthrenes</b>                      | 0.109  |                            |
| <b>Sum of trimethylated phenanthrenes</b>                     | 0.107  |                            |
| <b>phenanthrene</b>                                           | 0.986  |                            |
| <b>anthracene</b>                                             | 0.384  |                            |
| <b>3-methylphenanthrene</b>                                   | 0.335  |                            |
| <b>2-methylphenanthrene</b>                                   | 0.72   |                            |
| <b>2-methylanthracene</b>                                     | 0.441  | Grass, 400 °C <sup>6</sup> |
| <b>4- and 9-methylphenanthrene</b>                            | 0.56   |                            |
| <b>1-methylphenanthrene</b>                                   | 0.613  |                            |
| <b>1,7-dimethylphenanthrene</b>                               | 0.837  |                            |
| <b>fluoranthene</b>                                           | 0.512  |                            |

|                                                        |       |                            |
|--------------------------------------------------------|-------|----------------------------|
| pyrene                                                 | 0.689 |                            |
| retene                                                 | 0.099 |                            |
| benz[a]anthracene                                      | 0.246 |                            |
| chrysene                                               | 0.608 |                            |
| benzofluoranthenes                                     | 0.229 |                            |
| benzo[e]pyrene                                         | 0.294 |                            |
| benzo[a]pyrene                                         | 0.165 |                            |
| indeno[1,2,3-cd]pyrene                                 | 0.179 |                            |
| benzo[ghi]perylene                                     | 0.155 |                            |
| $\Sigma$ PAHs                                          | 15.52 |                            |
| Sum of 'pyrolytic' PAHs without methylated derivatives | 3.08  |                            |
| Sum of phenanthrene and its methylated derivatives     | 11.6  |                            |
| Sum of dimethylated phenanthrenes                      | 5.86  |                            |
| Sum of trimethylated phenanthrenes                     | 2.45  |                            |
| phenanthrene                                           | 5.32  |                            |
| anthracene                                             | 1.3   |                            |
| 3-methylphenanthrene                                   | 0.445 |                            |
| 2-methylphenanthrene                                   | 0.757 |                            |
| 2-methylanthracene                                     | 0.16  |                            |
| 4- and 9-methylphenanthrene                            | 0.197 |                            |
| 1-methylphenanthrene                                   | 0.333 |                            |
| 1,7-dimethylphenanthrene                               | 0.281 |                            |
| fluoranthene                                           | 2.081 |                            |
| pyrene                                                 | 2.15  |                            |
| retene                                                 | 0.011 |                            |
| benz[a]anthracene                                      | 1.15  | Grass, 500 °C <sup>6</sup> |
| chrysene                                               | 1.21  |                            |
| benzofluoranthenes                                     | 4.03  |                            |
| benzo[e]pyrene                                         | 2.15  |                            |
| benzo[a]pyrene                                         | 0.976 |                            |
| indeno[1,2,3-cd]pyrene                                 | 1.54  |                            |
| benzo[ghi]perylene                                     | 1.21  |                            |
| $\Sigma$ PAHs                                          | 30.2  |                            |
| Sum of 'pyrolytic' PAHs without methylated derivatives | 16.5  |                            |
| Sum of phenanthrene and its methylated derivatives     | 12.2  |                            |

|                                                               |       |                            |
|---------------------------------------------------------------|-------|----------------------------|
| <b>Sum of dimethylated phenanthrenes</b>                      | 4.63  |                            |
| <b>Sum of trimethylated phenanthrenes</b>                     | 0.505 |                            |
| <b>phenanthrene</b>                                           | 0.203 |                            |
| <b>anthracene</b>                                             | 0.017 |                            |
| <b>3-methylphenanthrene</b>                                   | 0.006 |                            |
| <b>2-methylphenanthrene</b>                                   | 0.008 |                            |
| <b>2-methylanthracene</b>                                     | n.d.  |                            |
| <b>4- and 9-methylphenanthrene</b>                            | 0.005 |                            |
| <b>1-methylphenanthrene</b>                                   | 0.004 |                            |
| <b>1,7-dimethylphenanthrene</b>                               | 0.002 |                            |
| <b>fluoranthene</b>                                           | 0.103 |                            |
| <b>pyrene</b>                                                 | 0.236 |                            |
| <b>retene</b>                                                 | 0.006 |                            |
| <b>benz[a]anthracene</b>                                      | 0.016 |                            |
| <b>chrysene</b>                                               | 0.124 | Grass, 600 °C <sup>6</sup> |
| <b>benzofluoranthenes</b>                                     | 0.148 |                            |
| <b>benzo[e]pyrene</b>                                         | 0.085 |                            |
| <b>benzo[a]pyrene</b>                                         | 0.021 |                            |
| <b>indenopyrene</b>                                           | 0.025 |                            |
| <b>benzo[g,h,i]perylene</b>                                   | 0.032 |                            |
| <b>∑PAHs</b>                                                  | 1.04  |                            |
| <b>Sum of 'pyrolytic' PAHs without methylated derivatives</b> | 0.789 |                            |
| <b>Sum of phenanthrene and its methylated derivatives</b>     | 0.232 |                            |
| <b>Sum of dimethylated phenanthrenes</b>                      | n.d.  |                            |
| <b>Sum of trimethylated phenanthrenes</b>                     | n.d.  |                            |
| <b>phenanthrene</b>                                           | 0.074 |                            |
| <b>anthracene</b>                                             | n.d.  |                            |
| <b>3-methylphenanthrene</b>                                   | 0.005 |                            |
| <b>2-methylphenanthrene</b>                                   | 0.005 |                            |
| <b>2-methylanthracene</b>                                     | n.d.  |                            |
| <b>4- and 9-methylphenanthrene</b>                            | n.d.  |                            |
| <b>1-methylphenanthrene</b>                                   | n.d.  | Grass, 700 °C <sup>6</sup> |
| <b>1,7-dimethylphenanthrene</b>                               | 0.01  |                            |
| <b>fluoranthene</b>                                           | 0.021 |                            |
| <b>pyrene</b>                                                 | 0.024 |                            |
| <b>retene</b>                                                 | 0.01  |                            |
| <b>benz[a]anthracene</b>                                      | 0.007 |                            |

|                                                               |       |                           |
|---------------------------------------------------------------|-------|---------------------------|
| <b>chrysene</b>                                               | 0.006 |                           |
| <b>benzofluoranthenes</b>                                     | 0.019 |                           |
| <b>benzo[e]pyrene</b>                                         | 0.018 |                           |
| <b>benzo[a]pyrene</b>                                         | n.d.  |                           |
| <b>indenopyrene</b>                                           | n.d.  |                           |
| <b>benzo[g,h,i]perylene</b>                                   | n.d.  |                           |
| <b>∑PAHs</b>                                                  | 0.19  |                           |
| <b>Sum of 'pyrolytic' PAHs without methylated derivatives</b> | 0.095 |                           |
| <b>Sum of phenanthrene and its methylated derivatives</b>     | 0.095 |                           |
| <b>Sum of dimethylated phenanthrenes</b>                      | n.d.  |                           |
| <b>Sum of trimethylated phenanthrenes</b>                     | n.d.  |                           |
| <b>phenanthrene</b>                                           | 0.029 |                           |
| <b>anthracene</b>                                             | n.d.  |                           |
| <b>3-methylphenanthrene</b>                                   | 0.002 |                           |
| <b>2-methylphenanthrene</b>                                   | 0.003 |                           |
| <b>2-methylanthracene</b>                                     | n.d.  |                           |
| <b>4- and 9-methylphenanthrene</b>                            | n.d.  |                           |
| <b>1-methylphenanthrene</b>                                   | n.d.  |                           |
| <b>1,7-dimethylphenanthrene</b>                               | n.d.  |                           |
| <b>fluoranthene</b>                                           | 0.007 |                           |
| <b>pyrene</b>                                                 | 0.029 |                           |
| <b>retene</b>                                                 | 0.031 |                           |
| <b>benz[a]anthracene</b>                                      | 0.002 |                           |
| <b>chrysene</b>                                               | 0.024 | Wood, 100 °C <sup>6</sup> |
| <b>benzofluoranthenes</b>                                     | 0.001 |                           |
| <b>benzo[e]pyrene</b>                                         | 0.002 |                           |
| <b>benzo[a]pyrene</b>                                         | n.d.  |                           |
| <b>indenopyrene</b>                                           | n.d.  |                           |
| <b>benzo[g,h,i]perylene</b>                                   | n.d.  |                           |
| <b>∑PAHs</b>                                                  | 0.130 |                           |
| <b>Sum of 'pyrolytic' PAHs without methylated derivatives</b> | 0.066 |                           |
| <b>Sum of phenanthrene and its methylated derivatives</b>     | 0.065 |                           |
| <b>Sum of dimethylated phenanthrenes</b>                      | n.d.  |                           |
| <b>Sum of trimethylated phenanthrenes</b>                     | n.d.  |                           |
| <b>phenanthrene</b>                                           | 0.041 | Wood, 200 °C <sup>6</sup> |



|                                                        |       |                           |
|--------------------------------------------------------|-------|---------------------------|
| anthracene                                             | 0.004 |                           |
| 3-methylphenanthrene                                   | 0.004 |                           |
| 2-methylphenanthrene                                   | 0.006 |                           |
| 2-methylanthracene                                     | n.d.  |                           |
| 4- and 9-methylphenanthrene                            | 0.003 |                           |
| 1-methylphenanthrene                                   | 0.004 |                           |
| 1,7-dimethylphenanthrene                               | 0.004 |                           |
| fluoranthene                                           | 0.012 |                           |
| pyrene                                                 | 0.025 |                           |
| retene                                                 | 0.134 |                           |
| benz[a]anthracene                                      | 0.002 |                           |
| chrysene                                               | 0.092 |                           |
| benzofluoranthenes                                     | 0.003 |                           |
| benzo[e]pyrene                                         | 0.002 |                           |
| benzo[a]pyrene                                         | n.d.  |                           |
| indenopyrene                                           | n.d.  |                           |
| benzo[g,h,i]perylene                                   | n.d.  |                           |
| ∑PAHs                                                  | 0.332 |                           |
| Sum of 'pyrolytic' PAHs without methylated derivatives | 0.137 |                           |
| Sum of phenanthrene and its methylated derivatives     | 0.191 |                           |
| Sum of dimethylated phenanthrenes                      | n.d.  |                           |
| Sum of trimethylated phenanthrenes                     | n.d.  |                           |
| phenanthrene                                           | 0.063 |                           |
| anthracene                                             | n.d.  |                           |
| 3-methylphenanthrene                                   | 0.003 |                           |
| 2-methylphenanthrene                                   | 0.003 |                           |
| 2-methylanthracene                                     | n.d.  |                           |
| 4- and 9-methylphenanthrene                            | 0.004 |                           |
| 1-methylphenanthrene                                   | 0.011 |                           |
| 1,7-dimethylphenanthrene                               | 0.723 | Wood, 300 °C <sup>6</sup> |
| fluoranthene                                           | 0.007 |                           |
| pyrene                                                 | 0.011 |                           |
| retene                                                 | 7.28  |                           |
| benz[a]anthracene                                      | 0.021 |                           |
| chrysene                                               | 0.099 |                           |
| benzofluoranthenes                                     | 0.002 |                           |
| benzo[e]pyrene                                         | 0.002 |                           |

|                                                               |       |                           |
|---------------------------------------------------------------|-------|---------------------------|
| <b>benzo[a]pyrene</b>                                         | 0.001 |                           |
| <b>indenopyrene</b>                                           | n.d.  |                           |
| <b>benzo[g,h,i]perylene</b>                                   | n.d.  |                           |
| <b>∑PAHs</b>                                                  | 12    |                           |
| <b>Sum of 'pyrolytic' PAHs without methylated derivatives</b> | 0.143 |                           |
| <b>Sum of phenanthrene and its methylated derivatives</b>     | 11.9  |                           |
| <b>Sum of dimethylated phenanthrenes</b>                      | 1.15  |                           |
| <b>Sum of trimethylated phenanthrenes</b>                     | 3.34  |                           |
| <b>phenanthrene</b>                                           | 0.84  |                           |
| <b>anthracene</b>                                             | 0.094 |                           |
| <b>3-methylphenanthrene</b>                                   | 0.204 |                           |
| <b>2-methylphenanthrene</b>                                   | 0.619 |                           |
| <b>2-methylanthracene</b>                                     | 0.081 |                           |
| <b>4- and 9-methylphenanthrene</b>                            | 0.303 |                           |
| <b>1-methylphenanthrene</b>                                   | 1.107 |                           |
| <b>1,7-dimethylphenanthrene</b>                               | 6.12  |                           |
| <b>fluoranthene</b>                                           | 0.175 |                           |
| <b>pyrene</b>                                                 | 0.296 |                           |
| <b>retene</b>                                                 | 4.96  |                           |
| <b>benz[a]anthracene</b>                                      | 0.203 |                           |
| <b>chrysene</b>                                               | 0.462 | Wood, 400 °C <sup>6</sup> |
| <b>benzofluoranthenes</b>                                     | 0.162 |                           |
| <b>benzo[e]pyrene</b>                                         | 0.211 |                           |
| <b>benzo[a]pyrene</b>                                         | 0.082 |                           |
| <b>indenopyrene</b>                                           | 0.06  |                           |
| <b>benzo[g,h,i]perylene</b>                                   | 0.076 |                           |
| <b>∑PAHs</b>                                                  | 26.6  |                           |
| <b>Sum of 'pyrolytic' PAHs without methylated derivatives</b> | 1.73  |                           |
| <b>Sum of phenanthrene and its methylated derivatives</b>     | 24.7  |                           |
| <b>Sum of dimethylated phenanthrenes</b>                      | 9.95  |                           |
| <b>Sum of trimethylated phenanthrenes</b>                     | 6.76  |                           |
| <b>phenanthrene</b>                                           | 2.08  |                           |
| <b>anthracene</b>                                             | 0.294 | Wood, 500 °C <sup>6</sup> |
| <b>3-methylphenanthrene</b>                                   | 0.161 |                           |
| <b>2-methylphenanthrene</b>                                   | 0.319 |                           |

|                                                               |       |                           |
|---------------------------------------------------------------|-------|---------------------------|
| <b>2-methylanthracene</b>                                     | 0.047 |                           |
| <b>4- and 9-methylphenanthrene</b>                            | 0.094 |                           |
| <b>1-methylphenanthrene</b>                                   | 0.212 |                           |
| <b>1,7-dimethylphenanthrene</b>                               | 0.165 |                           |
| <b>fluoranthene</b>                                           | 0.315 |                           |
| <b>pyrene</b>                                                 | 0.639 |                           |
| <b>retene</b>                                                 | 0.008 |                           |
| <b>benz[a]anthracene</b>                                      | 0.389 |                           |
| <b>chrysene</b>                                               | 0.509 |                           |
| <b>benzofluoranthenes</b>                                     | 0.59  |                           |
| <b>benzo[e]pyrene</b>                                         | 0.595 |                           |
| <b>benzo[a]pyrene</b>                                         | 0.203 |                           |
| <b>indenopyrene</b>                                           | 0.26  |                           |
| <b>benzo[g,h,i]perylene</b>                                   | 0.297 |                           |
| <b>∑PAHs</b>                                                  | 8.03  |                           |
| <b>Sum of 'pyrolytic' PAHs without methylated derivatives</b> | 3.8   |                           |
| <b>Sum of phenanthrene and its methylated derivatives</b>     | 3.9   |                           |
| <b>Sum of dimethylated phenanthrenes</b>                      | 0.851 |                           |
| <b>Sum of trimethylated phenanthrenes</b>                     | 0.169 |                           |
| <b>phenanthrene</b>                                           | 0.191 |                           |
| <b>anthracene</b>                                             | 0.014 |                           |
| <b>3-methylphenanthrene</b>                                   | 0.005 |                           |
| <b>2-methylphenanthrene</b>                                   | 0.005 |                           |
| <b>2-methylanthracene</b>                                     | n.d.  |                           |
| <b>4- and 9-methylphenanthrene</b>                            | 0.006 |                           |
| <b>1-methylphenanthrene</b>                                   | 0.005 |                           |
| <b>1,7-dimethylphenanthrene</b>                               | 0.003 |                           |
| <b>fluoranthene</b>                                           | 0.055 | Wood, 600 °C <sup>6</sup> |
| <b>pyrene</b>                                                 | 0.095 |                           |
| <b>retene</b>                                                 | 0.009 |                           |
| <b>benz[a]anthracene</b>                                      | 0.019 |                           |
| <b>chrysene</b>                                               | 0.131 |                           |
| <b>benzofluoranthenes</b>                                     | 0.121 |                           |
| <b>benzo[e]pyrene</b>                                         | 0.08  |                           |
| <b>benzo[a]pyrene</b>                                         | 0.015 |                           |
| <b>indenopyrene</b>                                           | 0.024 |                           |
| <b>benzo[g,h,i]perylene</b>                                   | 0.026 |                           |

|                                                        |              |                                |
|--------------------------------------------------------|--------------|--------------------------------|
| $\Sigma$ PAHs                                          | 0.801        |                                |
| Sum of 'pyrolytic' PAHs without methylated derivatives | 0.566        |                                |
| Sum of phenanthrene and its methylated derivatives     | 0.221        |                                |
| Sum of dimethylated phenanthrenes                      | n.d.         |                                |
| Sum of trimethylated phenanthrenes                     | n.d.         |                                |
| phenanthrene                                           | 0.046        |                                |
| anthracene                                             | 0.006        |                                |
| 3-methylphenanthrene                                   | n.d.         |                                |
| 2-methylphenanthrene                                   | n.d.         |                                |
| 2-methylanthracene                                     | n.d.         |                                |
| 4- and 9-methylphenanthrene                            | n.d.         |                                |
| 1-methylphenanthrene                                   | n.d.         |                                |
| 1,7-dimethylphenanthrene                               | n.d.         |                                |
| fluoranthene                                           | 0.012        |                                |
| pyrene                                                 | 0.018        |                                |
| retene                                                 | 0.008        |                                |
| benz[a]anthracene                                      | 0.043        |                                |
| chrysene                                               | 0.239        | Wood, 700 °C <sup>6</sup>      |
| benzofluoranthenes                                     | n.d.         |                                |
| benzo[e]pyrene                                         | n.d.         |                                |
| benzo[a]pyrene                                         | n.d.         |                                |
| indenopyrene                                           | n.d.         |                                |
| benzo[g,h,i]perylene                                   | n.d.         |                                |
| $\Sigma$ PAHs                                          | 0.373        |                                |
| Sum of 'pyrolytic' PAHs without methylated derivatives | 0.313        |                                |
| Sum of phenanthrene and its methylated derivatives     | 0.054        |                                |
| Sum of dimethylated phenanthrenes                      | n.d.         |                                |
| Sum of trimethylated phenanthrenes                     | n.d.         |                                |
| Naphthalene                                            | 27.100±1.800 |                                |
| Acenaphthylene                                         | 5.265±0.265  |                                |
| Acenaphthene                                           | 2.140±0.030  |                                |
| Fluorene                                               | 6.415±0.345  |                                |
| Phenanthrene                                           | 9.920±0.380  | Rice husk, 450 °C <sup>7</sup> |
| Anthracene                                             | 3.235±0.145  |                                |
| Fluoranthene                                           | 3.145±0.135  |                                |
| Pyrene                                                 | 3.720±0.180  |                                |
| Benz(a)anthracene                                      | 1.001±0.079  |                                |

|                                |                 |                                              |
|--------------------------------|-----------------|----------------------------------------------|
| <b>Chrysene</b>                | 0.968±0.082     |                                              |
| <b>Benzo(b)fluoranthene</b>    | 0.619±0.093     |                                              |
| <b>Benzo(k)fluoranthene</b>    | 0.115±0.009     |                                              |
| <b>Benzo(a)pyrene</b>          | 0.556±0.074     |                                              |
| <b>Indenol(1,2,3-cd)pyrene</b> | 0.160±0.028     |                                              |
| <b>Dibenzo(a,h)anthracene</b>  | 0.064±0.009     |                                              |
| <b>Benzo(g,h,i)perylene</b>    | 0.188±0.029     |                                              |
| <b>Total PAH (USEPA 16)</b>    | 64.650±3.650    |                                              |
| <b>Naphthalene</b>             | 6.683±0.332     |                                              |
| <b>Acenaphthylene</b>          | 0.774±0.133     |                                              |
| <b>Acenaphthene</b>            | 0.214±0.025     |                                              |
| <b>Fluorene</b>                | 0.237±0.011     |                                              |
| <b>Phenanthrene</b>            | 0.789±0.191     |                                              |
| <b>Anthracene</b>              | 0.144±0.034     |                                              |
| <b>Fluoranthene</b>            | 0.269±0.061     |                                              |
| <b>Pyrene</b>                  | 0.314±0.068     |                                              |
| <b>Benz(a)anthracene</b>       | 0.040±0.009     | Wood, 450 °C <sup>7</sup>                    |
| <b>Chrysene</b>                | 0.031±0.010     |                                              |
| <b>Benzo(b)fluoranthene</b>    | 0.040±0.004     |                                              |
| <b>Benzo(k)fluoranthene</b>    | n.d.            |                                              |
| <b>Benzo(a)pyrene</b>          | 0.023±0.004     |                                              |
| <b>Indenol(1,2,3-cd)pyrene</b> | n.d.            |                                              |
| <b>Dibenzo(a,h)anthracene</b>  | n.d.            |                                              |
| <b>Benzo(g,h,i)perylene</b>    | n.d.            |                                              |
| <b>Total PAH (USEPA 16)</b>    | 9.556±0.722     |                                              |
| <b>naphthalene</b>             | 0.10047±0.081   |                                              |
| <b>acenaphthylene</b>          | 0.00835±0.00066 |                                              |
| <b>acenaphthene</b>            | 0.10476±0.00799 |                                              |
| <b>fluorene</b>                | 0.05760±0.00605 |                                              |
| <b>phenanthrene</b>            | 0.18806±0.01880 |                                              |
| <b>anthracene</b>              | 0.04031±0.00372 |                                              |
| <b>fluoranthene</b>            | 0.04970±0.00494 |                                              |
| <b>pyrene</b>                  | 0.03881±0.00412 | Koszalin sewage sludges, 500 °C <sup>8</sup> |
| <b>benzo[a]anthracene</b>      | 0.03973±0.00380 |                                              |
| <b>chrysene</b>                | 0.03738±0.00374 |                                              |
| <b>benzo[b]fluoranthene</b>    | 0.05244±0.00573 |                                              |
| <b>benzo[k]fluoranthene</b>    | n.d.            |                                              |
| <b>benzo[a]pyrene</b>          | 0.04828±0.00417 |                                              |
| <b>indeno[1,2,3-cd]pyrene</b>  | n.d.            |                                              |
| <b>dibenz[a,h]anthracene</b>   | n.d.            |                                              |
| <b>benzo[ghi]perylene</b>      | n.d.            |                                              |
| <b>naphthalene</b>             | 0.11503±0.01236 | Koszalin sewage sludges, 600 °C <sup>8</sup> |
| <b>acenaphthylene</b>          | 0.00858±0.00079 |                                              |

|                               |                 |                                              |
|-------------------------------|-----------------|----------------------------------------------|
| <b>acenaphthene</b>           | 0.09490±0.00932 |                                              |
| <b>fluorene</b>               | 0.07347±0.00586 |                                              |
| <b>phenanthrene</b>           | 0.27237±0.02752 |                                              |
| <b>anthracene</b>             | 0.05137±0.00576 |                                              |
| <b>fluoranthene</b>           | 0.08260±0.00784 |                                              |
| <b>pyrene</b>                 | 0.05460±0.00614 |                                              |
| <b>benzo[a]anthracene</b>     | 0.04862±0.00561 |                                              |
| <b>chrysene</b>               | 0.04542±0.00420 |                                              |
| <b>benzo[b]fluoranthene</b>   | 0.06395±0.00566 |                                              |
| <b>benzo[k]fluoranthene</b>   | n.d.            |                                              |
| <b>benzo[a]pyrene</b>         | 0.05726±0.00516 |                                              |
| <b>indeno[1,2,3-cd]pyrene</b> | 0.00939±0.00092 |                                              |
| <b>dibenz[a,h]anthracene</b>  | n.d.            |                                              |
| <b>benzo[ghi]perylene</b>     | n.d.            |                                              |
| <b>naphthalene</b>            | 0.08049±0.00798 |                                              |
| <b>acenaphthylene</b>         | 0.01534±0.00135 |                                              |
| <b>acenaphthene</b>           | 0.07221±0.00614 |                                              |
| <b>fluorene</b>               | 0.08735±0.00958 |                                              |
| <b>phenanthrene</b>           | 0.24115±0.02120 |                                              |
| <b>anthracene</b>             | 0.06171±0.00594 |                                              |
| <b>fluoranthene</b>           | 0.08507±0.00941 |                                              |
| <b>pyrene</b>                 | 0.06398±0.00545 | Koszalin sewage sludges, 700 °C <sup>8</sup> |
| <b>benzo[a]anthracene</b>     | 0.06194±0.00651 |                                              |
| <b>chrysene</b>               | 0.05856±0.00555 |                                              |
| <b>benzo[b]fluoranthene</b>   | 0.08010±0.00660 |                                              |
| <b>benzo[k]fluoranthene</b>   | n.d.            |                                              |
| <b>benzo[a]pyrene</b>         | 0.09036±0.00909 |                                              |
| <b>indeno[1,2,3-cd]pyrene</b> | 0.01862±0.00212 |                                              |
| <b>dibenz[a,h]anthracene</b>  | n.d.            |                                              |
| <b>benzo[ghi]perylene</b>     | n.d.            |                                              |
| <b>naphthalene</b>            | 0.02408±0.00229 |                                              |
| <b>acenaphthylene</b>         | 0.00357±0.00038 |                                              |
| <b>acenaphthene</b>           | 0.5955±0.00532  |                                              |
| <b>fluorene</b>               | 0.06027±0.00659 |                                              |
| <b>phenanthrene</b>           | 0.16889±0.01677 | Kalisa sewage sludges, 500 °C <sup>8</sup>   |
| <b>anthracene</b>             | 0.05480±0.00567 |                                              |
| <b>fluoranthene</b>           | 0.05409±0.00539 |                                              |
| <b>pyrene</b>                 | 0.04647±0.00510 |                                              |
| <b>benzo[a]anthracene</b>     | 0.05699±0.00486 |                                              |

|                               |                  |                                            |
|-------------------------------|------------------|--------------------------------------------|
| <b>chrysene</b>               | 0.05244±0.0058   |                                            |
| <b>benzo[b]fluoranthene</b>   | n.d.             |                                            |
| <b>benzo[k]fluoranthene</b>   | n.d.             |                                            |
| <b>benzo[a]pyrene</b>         | 0.08475±0.00945  |                                            |
| <b>indeno[1,2,3-cd]pyrene</b> | n.d.             |                                            |
| <b>dibenz[a,h]anthracene</b>  | n.d.             |                                            |
| <b>benzo[ghi]perylene</b>     | n.d.             |                                            |
| <b>naphthalene</b>            | 0.05124±0.00588  |                                            |
| <b>acenaphthylene</b>         | 0.00464±0.00038  |                                            |
| <b>acenaphthene</b>           | 0.06661±0.00692  |                                            |
| <b>fluorene</b>               | 0.05306±0.00573  |                                            |
| <b>phenanthrene</b>           | 0.11802±0.01021  |                                            |
| <b>anthracene</b>             | 0.04333±0.00468  |                                            |
| <b>fluoranthene</b>           | 0.03651±0.00269  |                                            |
| <b>pyrene</b>                 | 0.03819±0.00386  |                                            |
| <b>benzo[a]anthracene</b>     | 0.04352±0.00483  | Kalisa sewage sludges, 600 °C <sup>8</sup> |
| <b>chrysene</b>               | 0.03995±0.00411  |                                            |
| <b>benzo[b]fluoranthene</b>   | 0.05823±0.00606  |                                            |
| <b>benzo[k]fluoranthene</b>   | n.d.             |                                            |
| <b>benzo[a]pyrene</b>         | 0.063.24±0.00596 |                                            |
| <b>indeno[1,2,3-cd]pyrene</b> | n.d.             |                                            |
| <b>dibenz[a,h]anthracene</b>  | n.d.             |                                            |
| <b>benzo[ghi]perylene</b>     | n.d.             |                                            |
| <b>naphthalene</b>            | 0.03064±0.00354  |                                            |
| <b>acenaphthylene</b>         | 0.00212±0.00023  |                                            |
| <b>acenaphthene</b>           | 0.06242±0.00537  |                                            |
| <b>fluorene</b>               | 0.04054±0.00346  |                                            |
| <b>phenanthrene</b>           | 0.08633±0.00905  |                                            |
| <b>anthracene</b>             | 0.03177±0.00302  |                                            |
| <b>fluoranthene</b>           | 0.02663±0.00244  |                                            |
| <b>pyrene</b>                 | 0.03268±0.00320  |                                            |
| <b>benzo[a]anthracene</b>     | 0.03433±0.00366  | Kalisa sewage sludges, 700 °C <sup>8</sup> |
| <b>chrysene</b>               | 0.03200±0.00358  |                                            |
| <b>benzo[b]fluoranthene</b>   | 0.04747±0.00441  |                                            |
| <b>benzo[k]fluoranthene</b>   | n.d.             |                                            |
| <b>benzo[a]pyrene</b>         | 0.05241±0.00569  |                                            |
| <b>indeno[1,2,3-cd]pyrene</b> | 0.00853±0.00079  |                                            |
| <b>dibenz[a,h]anthracene</b>  | n.d.             |                                            |
| <b>benzo[ghi]perylene</b>     | n.d.             |                                            |

|                               |                 |                                           |
|-------------------------------|-----------------|-------------------------------------------|
| <b>naphthalene</b>            | 0.08919±0.00835 |                                           |
| <b>acenaphthylene</b>         | 0.00260±0.00028 |                                           |
| <b>acenaphthene</b>           | 0.06366±0.00597 |                                           |
| <b>fluorene</b>               | 0.04804±0.00451 |                                           |
| <b>phenanthrene</b>           | 0.08052±0.00813 |                                           |
| <b>anthracene</b>             | 0.04281±0.00483 |                                           |
| <b>fluoranthene</b>           | 0.04196±0.00364 |                                           |
| <b>pyrene</b>                 | 0.03587±0.00334 | Chelm sewage sludges, 500 °C <sup>8</sup> |
| <b>benzo[a]anthracene</b>     | 0.04403±0.00424 |                                           |
| <b>chrysene</b>               | 0.04047±0.00430 |                                           |
| <b>benzo[b]fluoranthene</b>   | n.d.            |                                           |
| <b>benzo[k]fluoranthene</b>   | n.d.            |                                           |
| <b>benzo[a]pyrene</b>         | 0.05606±0.00623 |                                           |
| <b>indeno[1,2,3-cd]pyrene</b> | n.d.            |                                           |
| <b>dibenz[a,h]anthracene</b>  | n.d.            |                                           |
| <b>benzo[ghi]perylene</b>     | 0.01527±0.00148 |                                           |
| <b>naphthalene</b>            | 0.07426±0.00609 |                                           |
| <b>acenaphthylene</b>         | 0.00473±0.00047 |                                           |
| <b>acenaphthene</b>           | 0.06261±0.00698 |                                           |
| <b>fluorene</b>               | 0.04824±0.00482 |                                           |
| <b>phenanthrene</b>           | 0.10358±0.00980 |                                           |
| <b>anthracene</b>             | 0.03810±0.00427 |                                           |
| <b>fluoranthene</b>           | n.d.            |                                           |
| <b>pyrene</b>                 | 0.03522±0.00293 | Chelm sewage sludges, 600 °C <sup>8</sup> |
| <b>benzo[a]anthracene</b>     | 0.03940±0.00365 |                                           |
| <b>chrysene</b>               | 0.03644±0.00306 |                                           |
| <b>benzo[b]fluoranthene</b>   | n.d.            |                                           |
| <b>benzo[k]fluoranthene</b>   | n.d.            |                                           |
| <b>benzo[a]pyrene</b>         | 0.11056±0.01279 |                                           |
| <b>indeno[1,2,3-cd]pyrene</b> | n.d.            |                                           |
| <b>dibenz[a,h]anthracene</b>  | n.d.            |                                           |
| <b>benzo[ghi]perylene</b>     | 0.01336±0.00149 |                                           |
| <b>naphthalene</b>            | 0.08860±0.00989 |                                           |
| <b>acenaphthylene</b>         | n.d.            |                                           |
| <b>acenaphthene</b>           | 0.07117±0.00706 |                                           |
| <b>fluorene</b>               | 0.05600±0.00621 | Chelm sewage sludges, 700 °C <sup>8</sup> |
| <b>phenanthrene</b>           | 0.12526±0.01049 |                                           |
| <b>anthracene</b>             | 0.04842±0.00535 |                                           |
| <b>fluoranthene</b>           | 0.06813±0.00732 |                                           |



|                        |                 |                                             |
|------------------------|-----------------|---------------------------------------------|
| pyrene                 | 0.05605±0.00550 |                                             |
| benzo[a]anthracene     | 0.07179±0.00798 |                                             |
| chrysene               | 0.07344±0.00671 |                                             |
| benzo[b]fluoranthene   | 0.11033±0.01100 |                                             |
| benzo[k]fluoranthene   | n.d.            |                                             |
| benzo[a]pyrene         | 0.09216±0.00870 |                                             |
| indeno[1,2,3-cd]pyrene | 0.05799±0.00547 |                                             |
| dibenz[a,h]anthracene  | n.d.            |                                             |
| benzo[ghi]perylene     | 0.01336±0.00121 |                                             |
| naphthalene            | 0.09688±0.00804 |                                             |
| acenaphthylene         | 0.00465±0.00040 |                                             |
| acenaphthene           | 0.07900±0.00901 |                                             |
| fluorene               | 0.05329±0.00538 |                                             |
| phenanthrene           | 0.08524±0.00681 |                                             |
| anthracene             | 0.04761±0.00520 |                                             |
| fluoranthene           | 0.04919±0.00410 |                                             |
| pyrene                 | 0.04099±0.00380 | Suwalki sewage sludges, 500 °C <sup>8</sup> |
| benzo[a]anthracene     | 0.04835±0.00529 |                                             |
| chrysene               | 0.04451±0.00463 |                                             |
| benzo[b]fluoranthene   | n.d.            |                                             |
| benzo[k]fluoranthene   | n.d.            |                                             |
| benzo[a]pyrene         | 0.06180±0.00557 |                                             |
| indeno[1,2,3-cd]pyrene | n.d.            |                                             |
| dibenz[a,h]anthracene  | n.d.            |                                             |
| benzo[ghi]perylene     | n.d.            |                                             |
| naphthalene            | 0.10449±0.01144 |                                             |
| acenaphthylene         | 0.00503±0.00047 |                                             |
| acenaphthene           | 0.08012±0.00624 |                                             |
| fluorene               | 0.05475±0.00533 |                                             |
| phenanthrene           | 0.11648±0.01341 |                                             |
| anthracene             | 0.04912±0.00501 |                                             |
| fluoranthene           | 0.05217±0.00569 | Suwalki sewage sludges, 600 °C <sup>8</sup> |
| pyrene                 | 0.04235±0.00311 |                                             |
| benzo[a]anthracene     | 0.04878±0.00432 |                                             |
| chrysene               | 0.04470±0.00422 |                                             |
| benzo[b]fluoranthene   | n.d.            |                                             |
| benzo[k]fluoranthene   | n.d.            |                                             |
| benzo[a]pyrene         | 0.06806±0.00766 |                                             |
| indeno[1,2,3-cd]pyrene | n.d.            |                                             |

|                               |                 |                                             |
|-------------------------------|-----------------|---------------------------------------------|
| <b>dibenz[a,h]anthracene</b>  | n.d.            |                                             |
| <b>benzo[ghi]perylene</b>     | n.d.            |                                             |
| <b>naphthalene</b>            | 0.08174±0.00920 |                                             |
| <b>acenaphthylene</b>         | 0.00526±0.00060 |                                             |
| <b>acenaphthene</b>           | 0.00245±0.00723 |                                             |
| <b>fluorene</b>               | 0.04902±0.00416 |                                             |
| <b>phenanthrene</b>           | 0.09558±0.0080  |                                             |
| <b>anthracene</b>             | 0.04294±0.00366 |                                             |
| <b>fluoranthene</b>           | 0.09061±0.01004 |                                             |
| <b>pyrene</b>                 | 0.08547±0.00891 |                                             |
| <b>benzo[a]anthracene</b>     | 0.06639±0.00583 | Suwalki sewage sludges, 700 °C <sup>8</sup> |
| <b>chrysene</b>               | 0.10868±0.00997 |                                             |
| <b>benzo[b]fluoranthene</b>   | n.d.            |                                             |
| <b>benzo[k]fluoranthene</b>   | n.d.            |                                             |
| <b>benzo[a]pyrene</b>         | 0.35482±0.02661 |                                             |
| <b>indeno[1,2,3-cd]pyrene</b> | 0.05281±0.00527 |                                             |
| <b>dibenz[a,h]anthracene</b>  | n.d.            |                                             |
| <b>benzo[ghi]perylene</b>     | 0.01208±0.00132 |                                             |

\*: n.d.: not detected.

## References:

- (1) Becker, R.; Dorgerloh, U.; Helmig, M.; Mumme, J.; Diakite, M.; Nehls, I. Hydrothermally carbonized plant materials: Patterns of volatile organic compounds detected by gas chromatography. *Bioresource. Technol.* **2013**, *130*, 621–628.
- (2) Koltowski, M.; Oleszczuk, P. Toxicity of biochars after polycyclic aromatic hydrocarbons removal by thermal treatment. *Ecol. Eng.* **2015**, *75*, 79–85.
- (3) Freddo, A.; Cai, C.; Reid, B. J. Environmental contextualisation of potential toxic elements and polycyclic aromatic hydrocarbons in biochar. *Environ. Pollut.* **2012**, *171*, 18–24.
- (4) Hale, S. E.; Lehmann, J.; Rutherford, D.; Zimmerman, A. R.; Bachmann, R. T.; Shitumbanuma, V.; O'Toole, A.; Sundqvist, K. L.; Arp, H. P. H.; Cornelissen, G. Quantifying the total and bioavailable polycyclic aromatic hydrocarbons and dioxins in biochars. *Environ. Sci. Technol.* **2012**, *46* (5), 2830–2838.
- (5) Hilber, I.; Blum, F.; Leifeld, J.; Schmidt, H.-P.; Bucheli, T. D. Quantitative determination of PAHs in biochar: A prerequisite to ensure its quality and safe application. *J. Agr. Food Chem.* **2012**, *60* (12), 3042–3050.
- (6) Keiluweit, M.; Kleber, M.; Sparrow, M. A.; Simoneit, B. R. T.; Prah, F. G. Solvent-extractable polycyclic aromatic hydrocarbons in biochar: Influence of pyrolysis temperature and feedstock. *Environ. Sci. Technol.* **2012**, *46* (17), 9333–9341.
- (7) Quilliam, R. S.; Rangecroft, S.; Emmett, B. A.; DeLuca, T. H.; Jones, D. L. Is biochar a source or sink for polycyclic aromatic hydrocarbon (PAH) compounds in agricultural soils? *GCB Bioenergy* **2013**, *5* (2), 96–103.
- (8) Zielinska, A.; Oleszczuk, P. The conversion of sewage sludge into biochar reduces polycyclic aromatic hydrocarbon content and ecotoxicity but increases trace metal content. *Biomass. Bioenerg.* **2015**, *75*, 235–244.
